1 ***Krüppel-like factor* gene function in the ctenophore *Mnemiopsis leidyi* assessed by CRISPR/Cas9-**  
2 **mediated genome editing**

3

4 Jason S Presnell<sup>1,2</sup>, William E Browne<sup>1,\*</sup>

5

6 <sup>1</sup>Department of Biology, University of Miami, Cox Science Center, 1301 Memorial Drive, Miami, FL

7 33146, USA

8

9 <sup>2</sup>Present Address: Department of Human Genetics, University of Utah, 15 N 2030 E, Salt Lake City, UT

10 84112, USA

11 ORCID ID: 0000-0002-7225-6692

12

13 \*Corresponding Author:

14 William E. Browne, Department of Biology, University of Miami, Cox Science Center, 1301 Memorial

15 Drive, Miami, FL 33146, USA

16 305-284-3319

17 [w.browne@miami.edu](mailto:w.browne@miami.edu)

18 ORCID ID: 0000-0001-8200-6489

19

20 Keywords: Ctenophore, Krüppel-like factor, KLF5, endoderm, evolution, lithocyte

21

22

23

24

25

## 26 **Abstract**

27           The *Krüppel-like factor (Klf)* gene family encodes for transcription factors that play an important  
28 role in the regulation of stem cell proliferation, cell differentiation, and development in bilaterians. While  
29 *Klf* genes have been shown to functionally specify various cell types in non-bilaterian animals, their role  
30 in early diverging animal lineages has not been assessed. Thus, the ancestral activity of these transcription  
31 factors in animal development is not well understood. The ctenophore *Mnemiopsis leidyi* has emerged as  
32 an important non-bilaterian model system for understanding early animal evolution. Here we characterize  
33 the expression and functional role of *Klf* genes during *M. leidyi* embryogenesis. Zygotic *Klf* gene function  
34 was assessed with both CRISPR/Cas9-mediated genome editing and splice-blocking morpholino  
35 oligonucleotide knockdown approaches. Abrogation of zygotic *Klf* expression during *M. leidyi*  
36 embryogenesis results in abnormal development of several organs including the pharynx, tentacle bulbs,  
37 and apical organ. Our data suggest an ancient role for *Klf* genes in regulating endodermal patterning,  
38 possibly through regulation of cell proliferation.

39

## 40 **Summary Statement (~15-30 words)**

41           Using CRISPR/Cas9 genome editing and morpholino oligonucleotide knockdown, this study  
42 shows that tissues derived from the endoderm are dependent upon *Klf5* ortholog expression for proper  
43 development and patterning in the ctenophore *Mnemiopsis leidyi*.

44

45

## 46 **Introduction**

47           Members of the *Krüppel-like factor (Klf)* gene family encode transcription factors with a  
48 characteristic DNA binding domain composed of three C-terminal C2H2-zinc fingers (McConnell and  
49 Yang, 2010; Presnell et al., 2015). During metazoan diversification, the *Klf* transcription factor gene  
50 family expanded via duplication and domain shuffling events (Presnell et al., 2015). *Klf* transcription  
51 factors are expressed in a variety of cells and tissues and have roles in many biological processes,  
52 including proliferation of stem and progenitor cells, embryonic development, germ layer differentiation,  
53 neuronal growth and regeneration, immune system regulation and metabolic regulation (Bialkowska et  
54 al., 2017; McConnell and Yang, 2010; Moore et al., 2009; Nagai et al., 2009; Oishi and Manabe, 2018;  
55 Pearson et al., 2008; Sweet et al., 2018).

56

57           While KLF functional studies have been restricted to bilaterians, *Klf* genes are found in the  
genomes of all metazoans (Presnell et al., 2015) with a number of homologs expressed in multipotent

58 stem cells (Tarashansky et al., 2021). Within Cnidaria, *Klfs* are expressed in multipotent interstitial stem  
59 cells and their various downstream lineages, as well as in ectodermal epithelial stem cells in *Hydra*  
60 *vulgaris* (Hemmrich et al., 2012; Levy et al., 2021; Siebert et al., 2019). In cnidarian single-cell RNA-seq  
61 datasets, *Klfs* are expressed in various cell types, including gastrodermis, neuronal and gland cell lineages  
62 (Levy et al., 2021; Sebé-Pedrós et al., 2018a). In *Hydractinia symbiolongicarpus*, *Klf* genes are  
63 upregulated in male sexual polyp bodies vs female sexual polyp bodies (DuBuc et al., 2020). Within  
64 Porifera, *Klfs* are expressed in the stem-cell like archaeocytes, epithelial pinacocytes, and mesenchymal  
65 cells in both *Spongilla lacustris* and *Amphimedon queenslandica* (Musser et al., 2019 preprint; Sebé-  
66 Pedrós et al., 2018b). Single-cell RNA-seq data for the Placozoan *Trichoplax adhaerens* revealed a single  
67 *Klf* gene expressed in epithelial cells (Sebé-Pedrós et al., 2018b). In ctenophores, three *Klf* genes have  
68 been identified in two distantly related species, *Pleurobrachia bachei* and *Mnemiopsis leidyi* (Presnell et  
69 al., 2015). The genome of *M. leidyi* contains *MleKlf5a*, *MleKlf5b*, and *MleKlfX* (Presnell et al., 2015).  
70 *MleKlf5a* and *MleKlf5b* are the result of a lineage-specific duplication within the Ctenophora, while  
71 *MleKlfX* is highly derived with no clear orthology to any known metazoan *Klf* clade (Presnell et al.,  
72 2015). To date, single-cell and tissue-specific RNA-seq studies in *M. leidyi* have not established  
73 differential expression signatures for *Klf* genes (Babonis et al., 2018; Sebé-Pedrós et al., 2018b).

74 *M. leidyi* is a species of the non-bilaterian phylum Ctenophora, one of the earliest-diverging  
75 extant metazoan lineages (Dunn et al., 2008; Hejnol et al., 2009; Kapli and Telford, 2020; Li et al., 2021;  
76 Shen et al., 2017; Whelan et al., 2017). *M. leidyi* has been used extensively as a model for investigating  
77 early metazoan developmental patterning, regeneration, and the evolution of animal traits (Babonis et al.,  
78 2018; Bessho-Uehara et al., 2020; Fischer et al., 2014; Martindale and Henry, 1999; Presnell et al., 2016;  
79 Reitzel et al., 2016; Salinas-Saavedra and Martindale, 2020; Schnitzler et al., 2014; Yamada et al., 2010).  
80 *M. leidyi* embryos undergo a ctenophore-specific early cleavage program with gastrulation taking place  
81 ~3-5 hours post-fertilization (hpf) followed by tissue organization and organogenesis over the next  
82 several hours (Fischer et al., 2014; Freeman, 1976; Fig. 1A). Four pairs of ctene rows, one pair in each  
83 quadrant, are typically among the first differentiated ectodermal structures to appear (Fischer et al., 2014).  
84 Each ctene plate is made up of polster cells bearing fused giant cilia (Tamm, 1973). While initial ctene  
85 plate development is established by maternal factors (Fischer et al., 2014), new ctene row expansion  
86 begins post-hatching during the juvenile cydippid stage (Tamm, 2012). After the formation of the initial  
87 ctene rows, the developing embryo rapidly increases in size. This period of rapid growth is accompanied  
88 by pharynx elongation along the aboral/oral axis, the development of tentacle bulbs, and deposition of the

89 first lithocytes onto the balancer cilia of the apical organ (Martindale and Henry, 2015). Lithocytes are  
90 mineralized cells that form a statolith housed within the apical organ that functions to control orientation  
91 in the water column by coordinating ctene row beating (Jokura and Inaba 2020; Tamm 1973; Tamm  
92 2014).

93 Flanking the apical organ along the tentacular axis, a pair of ectodermal invaginations and  
94 internal endodermal cells form the developing tentacle bulb organs and their cognate tentacular lateral and  
95 median ridges, respectively (Martindale and Henry, 1997b; Martindale and Henry, 1999). Embryonic and  
96 adult tentacle bulb organs contain populations of highly proliferative cells in the tentacular lateral ridge  
97 and median ridge tissues that give rise to differentiated colloblast and tentacle muscle cells, respectively  
98 (Alié et al., 2011; Babonis et al., 2018; Jager et al., 2008; Schnitzler et al., 2014). Genes associated with  
99 germline development and stemness, including *Piwi*, *Vasa*, *Nanos*, and *Sox* homologs are highly  
100 expressed in both the lateral and median ridges of the tentacle bulb, as well as in proliferative cell  
101 populations in the developing apical organ and ctene rows, supporting the presence of progenitor cells  
102 with stem-cell like properties in these tissues. At ~18-20 hpf, the fully developed *M. leidyi* cydippid  
103 hatches and maintains a feeding, pelagic lifestyle before transitioning to the adult lobate body plan ~20  
104 days post hatching (Martindale and Henry, 2015). In adult animals, these progenitor cells play a role in  
105 the continuous replacement of lost cells (Alié et al., 2011; Jager et al., 2008; Reitzel et al., 2016;  
106 Schnitzler et al., 2014).

107 Previous investigations into gene function in *M. leidyi* have utilized morpholino oligonucleotide  
108 mediated knockdown or mRNA overexpression methods (Jokura et al., 2019; Salinas-Saavedra and  
109 Martindale, 2020; Yamada et al., 2010). Here we report the first use of CRISPR/Cas9 in *M. leidyi* for  
110 mutagenesis. We utilized CRISPR/Cas9 to disrupt zygotic function of two *Klf* genes, *MleKlf5a* and  
111 *MleKlf5b*. We show that disruption of *Klf* gene expression is associated with the abnormal development  
112 of various organs during *M. leidyi* embryogenesis due to the loss of specific endodermally derived cell  
113 types. Our data provides additional insight into the evolution of *Klf* gene family function both within the  
114 metazoan stem lineage and the early diverging ctenophore lineage. Our use of CRISPR/Cas9 to disrupt  
115 *Klf* gene expression and the subsequent characterization of the loss of *Klf* expression on development and  
116 tissue patterning in *M. leidyi* provide a foundation for future mutagenesis studies in ctenophores.

117

## 118 **Results**

### 119 ***MleKlf5a*, *MleKlf5b*, and *MleKlfX* expression during embryonic development**

120 *MleKlf5a* and *MleKlf5b* transcripts are maternally loaded in *M. leidyi* (Davidson et al., 2017)  
121 similar to maternal loading of a number of *Klf* genes in other metazoans (Blakeley et al., 2015; De Graeve  
122 et al., 2003; Weber et al., 2014). *MleKlf5a* and *MleKlf5b* transcripts were detected in all embryonic cells  
123 through gastrulation (Fig. 1B-E). Post-gastrulation, transcripts for both *MleKlf5a* and *MleKlf5b* became  
124 spatially restricted to cell populations associated with the developing pharynx, gastrovascular system,  
125 tentacle bulb median ridges, and within the developing apical organ (Fig. 1F-Q).

126 Within the developing pharynx, *MleKlf5a* and *MleKlf5b* expression were initially widespread  
127 (Fig. 1G,I). As the pharynx elongated, *MleKlf5a* and *MleKlf5b* expression became restricted to the  
128 interior-most cell layers of the medial and aboral pharyngeal regions (Fig. 1K,M,O,Q). The aboral-most  
129 region of the pharynx includes cells that form the junction with the central gastrovascular cavity, or  
130 infundibulum. *MleKlf5a* and *MleKlf5b* expression was found throughout the endodermal epithelial lining  
131 of the presumptive gastrodermis (Fig. 1J-Q). During the initial development of the aboral apical organ,  
132 *MleKlf5a* and *MleKlf5b* expression was detected in the apical organ floor epithelia. As the apical organ  
133 developed, *MleKlf5a* and *MleKlf5b* expression became progressively restricted to cells located along the  
134 tentacular axis that are positionally correlated with sites of lithocyte formation (Tamm, 2014; Fig.  
135 1K,O,M,Q). Within the developing tentacle bulbs, both *MleKlf5a* and *MleKlf5b* were expressed in the  
136 tentacular median ridge (Fig. 1F-Q). An additional unique *MleKlf5b* expression domain was detected in a  
137 narrow band of epidermal cells surrounding newly formed ctene row polster cells (Fig. 1H,L,P, Fig.  
138 S1A,B).

139 In contrast to both *MleKlf5a* and *MleKlf5b*, *MleKlfX* expression was restricted to late  
140 embryogenesis, first appearing ~16 hpf. Expression of *MleKlfX* transcripts were localized to a small  
141 number of cells within the apical organ (Fig. S1C,D). One group of *MleKlfX* expressing cells was located  
142 deep within the central epithelial floor of the developing apical organ. These cells were located along the  
143 tentacular axis and pharyngeal axis forming a cross-shaped pattern (Fig. S1C). A second shallower group  
144 of *MleKlfX* expressing cells was located within each quadrant just medial of the ciliated grooves in the  
145 developing apical organ (Fig. S1D). These *MleKlfX* expressing cells correspond positionally with the  
146 apical organ lamellate bodies, which may represent putative photoreceptor cells (Horridge, 1964a; Jokura  
147 and Inaba, 2020; Schnitzler et al., 2012), suggesting that *MleKlfX* expression may be associated with light  
148 sensing neuronal cell types in the apical organ.

149

150 **CRISPR/Cas9 and splice-blocking morpholino experimental design**

151 To characterize zygotic *Klf* gene function in *M. leidyi*, we used both CRISPR/Cas9 mutagenesis  
152 and splice-blocking morpholinos (sbMOs) to independently knockdown *Klf* gene expression during  
153 embryonic development (Fig. 2). We focus on *MleKlf5a* and *MleKlf5b* knockdown experiments, as initial  
154 *MleKlfX* gene knockdown experiments failed to produce obvious morphological phenotypes. Importantly,  
155 it has been previously shown that co-expressed KLFs bind to shared downstream regulatory targets  
156 resulting in complex functional outcomes. For example, KLF2, KLF4, and KLF5 have redundant roles in  
157 the downstream regulation of *Nanog* (Jiang et al., 2008), KLF2 and KLF4 play redundant roles in  
158 regulating attachment between tendon and bone tissue (Kult et al., 2021), whereas competition between  
159 KLF1 and KLF3 for binding sites can result in disparate functional outcomes (Ilsley et al., 2017). For this  
160 reason, we sought to maximize the efficiency of generating an observable phenotype by performing  
161 simultaneous *MleKlf5a* and *MleKlf5b* knockdown with both sbMO and CRISPR/Cas9 genome editing  
162 experiments.

163 We injected single-cell embryos with either *MleKlf5a+MleKlf5b* sbMOs (KLF-MO embryos) or  
164 *MleKlf5a-sgRNA+MleKlf5b-sgRNA* (KLF-Cas9 embryos). Microinjected embryos were allowed to  
165 develop to ~20 hpf, stained with vital dyes, live-imaged, and compared to equivalent late-stage wildtype  
166 embryos from the same spawns. We used fluorescence based vital dyes to mark and follow asymmetries  
167 in subcellular components associated with key morphological structures in live animals. For example,  
168 MitoTracker fluorescence in whole embryos preferentially marks ctene row polster cells containing giant  
169 mitochondria with atypical cristae (Horridge, 1964b). In contrast, LysoTracker fluorescence in whole  
170 embryos preferentially marks cells containing yolk and large acidic vacuoles associated with the  
171 developing gastrovascular cavity and endodermal canals. After phenotype documentation, live animals  
172 were recovered and individually processed for DNA or RNA to validate either CRISPR/Cas9 or MO  
173 activity, respectively.

174 Efficient microinjection of knockdown and knockout reagents requires the mechanical removal of  
175 the outer vitelline membrane surrounding the fertilized egg. To determine if mechanically removing the  
176 vitelline membrane had an effect on embryogenesis, we scored the percentage of normal development in  
177 embryos that were removed from the vitelline membrane but not injected. There was no significant  
178 difference in the percentage of normal development between embryos kept in their vitelline membrane  
179 (85%,  $n = 161$ ) and those that had their vitelline membrane removed but not subsequently microinjected  
180 (80%,  $n = 217$ ;  $\chi^2=1.5272$ ,  $p=0.217$ ; Fig. S2A). Additionally, microinjections with a standard control MO

181 (79% normal,  $n = 49$ ), Cas9 protein alone (86% normal,  $n = 7$ ), or with sgRNAs alone (75% normal,  $n =$   
182 4) also had no detectable effect on embryonic development (Fig. S2A).

183 We validated gene expression knockdown efficiency by selecting a subset of KLF-MO, KLF-  
184 Cas9, and wildtype embryos for single-embryo RNA or DNA analyses post-experimental manipulation.  
185 For both *MleKlf5a* and *MleKlf5b*, sbMOs produced mRNA splicing errors in KLF-MO embryos via exon  
186 skipping and/or intron retention (Fig. 2A,B,E,F). An initial set of 4 single guide RNAs (sgRNAs) were  
187 designed for *MleKlf5a* and *MleKlf5b* (Table 1) based on the *M. leidyi* reference genome (Moreland et al.,  
188 2014; Moreland et al., 2020; Varshney et al., 2015). For each gene, a single sgRNA, *MleKlf5a-sgRNA4*  
189 and *MleKlf5b-sgRNA3* (Fig. 2A,E), proved efficient at mediating Cas9 double-stranded break activity at  
190 the target loci (Fig. 2C,D,G,H). Sanger sequencing followed by ICE analysis (Hsiao et al., 2019 preprint)  
191 revealed a clear degradation of sequence trace signal at the target loci in KLF-Cas9 embryos as compared  
192 to control embryos (Fig. 2C,G), indicating the presence of indels and putative frameshift mutations  
193 generated by sgRNA targeted Cas9 exonuclease activity (Fig. S2C). ICE analysis predicted the  
194 occurrence of frameshift mutations between ~20-30% (Fig. S2C).

195 We reduced the chance of potential off target site (OTS) Cas9 mediated exonuclease activity by  
196 designing sgRNAs that had no fewer than 3 mismatches to non-target loci in the *M. leidyi* reference  
197 genome. To assess potential OTS Cas9 exonuclease activity, we designed primers, amplified and Sanger  
198 sequenced regions around the remaining set of predicted low probability cut sites of non-KLF genes. No  
199 evidence of Cas9 exonuclease activity was observed (Table 2). Thus, we interpreted that phenotypes  
200 generated by both gene abrogation approaches in our study were due to the simultaneous disruption of  
201 *MleKlf5a* and *MleKlf5b* gene expression.

202

### 203 **Knockdown of zygotic *MleKlf5a* and *MleKlf5b* expression**

204 KLF-MO and KLF-Cas9 embryos phenocopied one another and displayed phenotypes of varying  
205 penetrance (Fig. 3A-Q). A higher proportion of severe phenotypes were observed among KLF-Cas9  
206 embryos as compared to KLF-MO embryos (Fig. S2B), reflecting the effects of Cas9-mediated genome  
207 editing versus titration of functional mRNAs by sbMOs. In contrast to the observation of predominantly  
208 severe phenotypes in KLF-Cas9 embryos injected with *MleKlf5a-sgRNA4+MleKlf5b-sgRNA3* (Fig.  
209 3P,Q), single gene knockdown using either *MleKlf5a-sgRNA4* or *MleKlf5b-sgRNA3* primarily generated  
210 mild phenotypes (Fig. S3).



211 KLF-MO and KLF-Cas9 embryos with mild phenotypes underwent pharyngeal elongation  
212 simultaneous with both mesoglea extrusion and a concomitant increase in size similar to that observed in  
213 control embryos; however, experimental embryos displayed disorganized patterning at the aboral end of  
214 the pharynx and the infundibular gastrovascular cavity (Fig. 3F,G,N,O). Occasionally, we observed  
215 pharyngeal bifurcation at the junction of the pharynx with the infundibular gastrovascular cavity (Fig.  
216 3G,O, Fig. S4). In contrast, in severely affected embryos, the internal embryonic space typically occupied  
217 by mesogleal extracellular matrix (ECM) was absent and the interior volume was completely occupied by  
218 gastrovascular endoderm and abnormally elongated pharyngeal tissue. Thus, embryos having severe  
219 phenotypes failed to increase in size most likely due to the lack of ECM extrusion into the mesoglea space  
220 (Fig. 3A,H,I,P,Q). Both the stomodeum and oral regions of the pharynx were still visible in severe mutant  
221 embryos, indicating that the entire pharyngeal structure was not lost. However, it is unclear whether the  
222 observed abnormal pharyngeal elongation is caused by *Klf* gene abrogation directly or is a spatial effect  
223 due to the absence of mesogleal ECM.

224 Among both KLF-MO and KLF-Cas9 embryos, patterning defects were also observed in the  
225 apical organ (Fig. 3, Fig. 4A-G). *MleKlf5a* and *MleKlf5b* knockdown resulted in a significant reduction of  
226 apical organ lithocytes as compared to control embryos (Fig. 4A-G). By 20 hpf, control embryo statocysts  
227 contained an average of ~7 lithocytes (Fig. 4A,B,G). KLF-MO embryos had an average ~4 lithocytes,  
228 with three embryos lacking lithocytes entirely (Fig. 4C,D,G). KLF-Cas9 embryos had an average of ~2  
229 lithocytes, with five embryos completely lacking lithocytes (Fig. 4E-G). Notably both KLF-MO and  
230 KLF-Cas9 embryos lacking lithocytes still possessed phenotypically normal balancer cilia and dome cilia,  
231 tissues derived from ectoderm (Fig. 4D,F).

232 The simultaneous abrogation of *MleKlf5a* and *MleKlf5b* also resulted in a dramatic reduction in  
233 tentacle bulb size, particularly in the tentacular median ridge (Fig. 3, Fig. 4H-N). We measured the  
234 tentacular median ridge width and found significant differences between control and injected embryos  
235 (Fig. 4N, Fig. S5). The control embryo average tentacular median ridge width was ~23  $\mu\text{m}$ . KLF-MO  
236 (Fig. 4J,K) and KLF-Cas9 (Fig. 4L,M) embryo average tentacular median ridge width was ~18  $\mu\text{m}$  and  
237 ~9  $\mu\text{m}$ , respectively (Fig. 4N). Moreover, we observed that 15% of KLF-MO embryos and 29% of KLF-  
238 Cas9 embryos lacked tentacular median ridges altogether (Fig. 4J-N).

239 In severely affected animals we observed a significant increase in the density of epidermal cells,  
240 ~100 nuclei/100  $\mu\text{m}^2$  in severe embryos compared to ~50 nuclei/100  $\mu\text{m}^2$  in wildtype embryos ( $p < .005$ ;  
241 Fig. 4O-T). The spacing between epidermal cell nuclei was closer among the severe phenotypes relative



242 to normally developing animals (Fig. 4O-S). This suggests reduced lateral tension forces on epidermal  
243 cells in animals lacking underlying mesogleal ECM and indicates that the total number of epidermal cells  
244 remained the same, only their spatial relationship was altered (i.e., closer spacing of nuclei). Thus, despite  
245 a decreased total body size, the ectodermal cell contribution to the epidermis appears to be largely  
246 unaffected.

247 The tentacular median ridge in adult *Pleurobrachia pileus* and juvenile *M. leidyi* cydippids has  
248 previously been shown to contain populations of proliferative cells (Alié et al., 2011; Reitzel et al., 2016;  
249 Schnitzler et al., 2014). In our *MleKlf5a* and *MleKlf5b* knockdown experiments, the relative size of the  
250 tentacular median ridge was consistently reduced, therefore we decided to perform EdU incorporation  
251 assays during mid-late embryogenesis to assess cell proliferation (Fig. S6). We observed reduced EdU  
252 incorporation in areas affected by the knockdown of *MleKlf5a* and *MleKlf5b*, including the tentacular  
253 median ridge and pharynx, suggesting that reduced cell proliferation rates are associated with the  
254 attenuation of zygotic *MleKLF5a* and *MleKLF5b* activity (Fig. S6J,K).

255

## 256 Discussion

257 Our expression analyses of *MleKlf5a* and *MleKlf5b* in *M. leidyi* show that transcripts of both  
258 genes are maternally loaded and ubiquitously distributed through gastrulation (Fig. 1B-E), corroborating  
259 previous RNA-seq results which detected abundant transcripts for both *MleKlf5a* and *MleKlf5b* during *M.*  
260 *leidyi* early embryonic cleavage stages (Davidson et al., 2017). Knockdown of zygotic *MleKlf5a* and  
261 *MleKlf5b* expression does not appear to impact early embryonic development, as injected embryos  
262 underwent normal early cleavage and gastrulation. The zygotic expression of *MleKlf5a* and *MleKlf5b*  
263 display localized spatio-temporal patterns in post-gastrulation embryos and transcripts for both *MleKlf5a*  
264 and *MleKlf5b* are expressed in the developing pharynx, gastrodermis, tentacle bulbs and apical organ  
265 (Fig. 1F-Q). These similar expression patterns could be due to functionally redundant roles (Lynch and  
266 Conery, 2000). In contrast, the expression of *MleKlfX* transcripts are restricted to late stages of  
267 development in a subset of apical organ epithelial cells (Fig. S1C,D). The *M. leidyi* *KlfX* gene sequence is  
268 highly divergent relative to other metazoan *Klf* genes (Presnell et al., 2015), suggestive of a *Mnemiopsis*-  
269 specific functional role for *MleKlfX*.

270 The *Klf* gene complement in *M. leidyi* is reduced compared to other non-bilaterian lineages  
271 (Presnell et al., 2015), a trend observed in other ctenophore gene families (Moroz et al., 2014; Ryan et al.,  
272 2013). *Klf5-like* genes are found in all metazoans (McCulloch and Koenig, 2020; Presnell et al., 2015).

273 Among the non-bilaterian phyla, a *Klf5* ortholog in the cnidarian *Nematostella vectensis* genome was  
274 shown to be expressed in a cluster of cells associated with digestive filaments and the gastrodermis (Sebé-  
275 Pedrós et al., 2018a). In sponges, a *Klf5* ortholog was found to be expressed in stem-cell like archaeocytes  
276 in the marine sponge *Amphimedon queenslandica* (Sebé-Pedrós et al., 2018b), and in the digestive  
277 choanocytes and peptidocytes of the freshwater sponge *Spongilla lacustris* (Musser et al., 2019 preprint).  
278 In vertebrates, *Klf5* orthologs are required for the maintenance of intestinal crypt epithelia in the gut (Gao  
279 et al., 2015; Kuruvilla et al., 2015; McConnell et al., 2011; Nandan et al., 2015). While less is known  
280 about *Klf5* orthologs from invertebrate bilaterians, *Klf5* is expressed in several cephalopod embryonic  
281 tissues including yolk cells and the developing mouth (McCulloch and Koenig, 2020). In our previous  
282 phylogenetic study, it was unclear whether the few identified invertebrate sequences were either *Klf4* or  
283 *Klf5*, which share high sequence similarity (Presnell et al., 2015). One of these sequences, *Drosophila*  
284 *melanogaster dar1*, shares sequence similarity to human *Klf5* but has a functional role more similar to  
285 human *Klf4*, and was shown to play a role in regulation of gut proliferation (Wu et al., 2018b). Based on  
286 our expression analysis of *MleKlf5a* and *MleKlf5b* and the observed dysregulation of gastrodermal  
287 patterning in *MleKlf5a+MleKlf5b* knockdown embryos, our data suggest an evolutionarily conserved role  
288 for *Klf5-like* orthologs in the regulation and maintenance of gut epithelia among metazoans.

289 *M. leidy* endodermal cell lineages stem from early cleavage stage E and M oral macromeres  
290 while ectodermal lineages originate from the aboral micromeres. Fate mapping experiments show that the  
291 ectodermal micromeres contribute to the epidermis, ctene rows, tentacle epithelia and colloblasts,  
292 balancer cilia and the epithelial floor of the apical organ, while the endodermal macromeres give rise to  
293 the gastrodermis and associated endodermal canal system, muscle, tentacular median ridge, and apical  
294 organ lithocytes (Henry and Martindale, 2001; Martindale and Henry, 1997a; Martindale and Henry,  
295 1999). Dysregulation of *MleKlf5a* and *MleKlf5b* show consistent abnormal phenotypes associated with  
296 the development of the apical organ and tentacle bulbs. In the apical organ of *MleKlf5a* and *MleKlf5b*  
297 dysregulated embryos, the development of endodermally derived lithocytes is reduced or absent while the  
298 ectodermally derived epithelial floor, balancer cilia, and dome cilia appear normal (Fig. 4A-G). Similarly  
299 in the developing tentacle bulb, abrogation of *MleKlf5a* and *MleKlf5b* activity resulted in the absence or  
300 reduction in size of the endodermally derived tentacular median ridge, which gives rise to the tentacle  
301 muscular core (Alié et al., 2011; Fig. 4H-N, Fig. S6L-N). Remaining tentacle tissue likely represents  
302 ectodermal contributions to tentacle epithelia and colloblasts. The development of other ectodermally  
303 derived structures, including the stomodeum and epidermal cells (Martindale and Henry, 1999), were

304 unaffected (Fig. 4O-T). These results suggest that *MleKlf5a* and *MleKlf5b* play a functional role in the  
305 development and maintenance of endodermally derived tissues during *M. leidyi* embryogenesis.

306 With regard to the unique ectodermal expression domain of *MleKlf5b* (Fig. S1A,B), overall no  
307 ectodermal or ctene row patterning phenotypes were observed in KLF-Cas9 embryos. In a few cases,  
308 ctene rows showed gross spatial disorganization, possibly reflecting a requirement for coordinated contact  
309 between ectoderm and underlying endoderm for precise ctene row alignment. For example, in  
310 phenotypically mild KLF-MO and KLF-Cas9 embryos, ctene row morphogenesis did not occur in  
311 quadrants in which endodermal tissue failed to contact ectodermal tissue (Fig. 3A,F,N). This result  
312 corroborates prior analyses indicating that ctene row development is at least partially regulated through  
313 inductive interactions between endodermal and ectodermal cell lineages (Fischer et al., 2014; Henry and  
314 Martindale, 2001; Henry and Martindale, 2004; Martindale and Henry, 1997a). One possible explanation  
315 for the observed *MleKlf5b* expression pattern could be that *MleKlf5b* is expressed in developing light  
316 producing photocytes derived from endodermal 2M macromeres that run subjacent to the ctene rows  
317 (Anctil, 1985; Fischer et al., 2014; Freeman and Reynolds, 1973; Martindale and Henry, 1999; Schnitzler  
318 et al., 2012). An EdU-positive ring of proliferative cells is situated around the ctene rows (Fig. S6C,G).  
319 These proliferative, *MleKlf5b* positive cells may represent photocyte progenitor cells, as photocytes  
320 differentiate relatively early during development (Fischer et al., 2014). Notably, the initial development of  
321 differentiated polster cells/ctenes is specified by maternal factors, with additional ctenes generated post  
322 embryonically. Therefore, zygotic *MleKlf5b* would not directly impact the specification of the initial  
323 ctenes during the stages observed in our study. An alternative explanation is that these *MleKlf5b*- and  
324 EdU-positive ectodermal cells represent progenitor cells that will give rise to new polster cells post-  
325 hatching and thus contribute to ctene row expansion.

326 In mammalian lineages *Klf5* orthologs help maintain stem cell renewal and promote proliferation  
327 in the intestinal crypt and in pluripotent embryonic stem cells (Jiang et al., 2008; Kuruvilla et al., 2015;  
328 Nandan et al., 2015; Parisi et al., 2008; Parisi et al., 2010). However, a recent study suggests that  
329 mammalian pluripotency factors are not necessarily conserved in all animals, and the ancestral metazoan  
330 stem cell toolkit primarily consisted of genes associated with the germline multipotency program (Alié et  
331 al., 2015; Juliano et al., 2010). Germline genes, including *Piwi*, *Bruno*, and *Pl-10*, have been shown to be  
332 expressed in putative progenitor cell populations in the tentacle bulb, ctene rows, and apical organ of  
333 adult *Pleurobrachia* (Alié et al., 2011). In *M. leidyi* cydippids, *Piwi*, *Vasa*, as well as *Sox* pluripotency  
334 factors are expressed in these same tissues, suggesting that progenitor cell populations in these tissues

335 express both pluripotency factors as well as germline factors (Reitzel et al., 2016; Schnitzler et al., 2014).  
336 Our EdU-staining recapitulates earlier work identifying zones of cell proliferation associated with the  
337 developing pharynx, gastrodermis, areas around the ctene rows, and in the apical organ epithelial floor  
338 (Reitzel et al., 2016; Schnitzler et al., 2014; Fig. S6B-I). These areas of cell proliferation correlate with  
339 the zygotic transcript expression domains, including the tentacular median ridge, of both *MleKlf5a* and  
340 *MleKlf5b* (Fig. 1, Fig. S6J).

341 Notably, sponge orthologs to *Klf5*, *Piwi*, *Bruno* and *Pl-10* are expressed in archaeocyte and  
342 choanocyte cell types variably recognized as sponge equivalents to totipotent, pluripotent, and/or  
343 multipotent stem cells (Alié et al., 2015; Musser et al., 2019 preprint; Nakanishi et al., 2014; Sebé-Pedrós  
344 et al., 2018b; Sogabe et al., 2019). Although we were unable to perform quantitative analyses, our  
345 qualitative assessments show a diminution/loss of EdU-positive cells in the tentacular median ridge and  
346 apical organ in *MleKlf5a+MleKlf5b* knockdown embryos (Fig. 6K). One interpretation of our results is  
347 that *MleKlf5a* and *MleKlf5b* are expressed in proliferative cells and play a functional role in the  
348 maintenance of multipotent endodermal progenitor cell populations.

349 To resolve whether *MleKlf5a* or *MleKlf5b* expressing cells are both proliferative and multipotent  
350 will require additional experimentation. Future experiments involving the knockdown of pluripotency and  
351 germline determination genes, such as *Piwi* and *Vasa*, along with EdU assays may reveal further aspects  
352 of cellular proliferation and specification associated with *Klf* activity. Alternatively, the observed  
353 phenotypes may be due to proliferation-independent mechanisms establishing terminal cell identity. For  
354 example, *MleKlf5a* and *MleKlf5b* may regulate the terminal specification of lithocyte and tentacle muscle  
355 cell types. Based on this work, while the explicit regulatory role of *MleKlf5a* and *MleKlf5b* remains  
356 unclear, our results show that *MleKlf5a* and *MleKlf5b* are functionally associated with the formation,  
357 developmental patterning and maintenance of endodermally derived structures in *M. leidyi* including the  
358 gastrodermis, the tentacular median ridge, tentacle muscle, and apical organ lithocytes. This functional  
359 activity may be through the maintenance of multipotent progenitor cell proliferation, and may represent a  
360 conserved ancestral function for this transcription factor gene family in the animal stem lineage. Overall,  
361 our results begin to lay the groundwork for assessing gene function essential for the embryonic  
362 development of *M. leidyi* and thus inform developmental mechanisms unique to Ctenophora for the  
363 specification of terminally differentiated tissue and cell types (e.g., lithocytes).

364 In this study, we report the first use of CRISPR/Cas9 mutagenesis to investigate gene function in  
365 a species of ctenophore. We describe techniques that are cost effective and can easily be used by others to

366 assess phenotypes and validate Cas9 activity (e.g., vital dye labeling, Sanger sequencing). This  
367 foundational work shows that CRISPR/Cas9 is an effective method for evaluating developmental  
368 phenotypes from single or combinatorial gene function loss in G0 ctenophore embryos. Future studies can  
369 refine our protocol to generate more efficient CRISPR/Cas9 mutagenesis by choosing different targets  
370 within loci (e.g., the transcriptional start site) and by increasing or modifying Cas9 exonuclease activity.  
371 Techniques have recently been developed that improve Cas9 editing, resulting in high percentages  
372 (>80%) of indel mutations (Hoshijima et al., 2019; Wu et al., 2018a). Although cell-autonomous  
373 phenotypes can be detected in G0 Cas9-injected embryos, which is useful for generating hypotheses  
374 regarding gene function, the characterization of stable and heritable non-lethal mutations (i.e., in F1  
375 embryos) would be even better. *M. leidy* are self-fertile hermaphrodites which could be leveraged to  
376 enable rapid creation of stable lines useful for characterization of mutations generated via CRISPR/Cas9.  
377 Along with recent RNA-seq data highlighting candidate genes associated with zygotic gene activation and  
378 patterning of specific cell types in ctenophores (Babonis et al., 2018; Davidson et al., 2017; Seb e-Pedr s  
379 et al., 2018b), CRISPR/Cas9 mutagenesis in *M. leidy* (and potentially other ctenophore species) will  
380 provide much needed insight into the genetic mechanisms underlying unique facets of ctenophore biology  
381 (Bessho-Uehara et al., 2020; Jokura et al., 2019; Yamada et al., 2010) and further our understanding of  
382 early metazoan evolution.

383

## 384 **Materials and methods**

### 385 **Cloning and *in situ* hybridization**

386 RNA was extracted using Trizol (Thermo Fisher Scientific) from *Mnemiopsis* embryos collected  
387 at different developmental stages and used to generate cDNA libraries (SMARTer kit, Clontech). The  
388 coding sequences of *MleKlf5a*, *MleKlf5b*, and *MleKlfX* were amplified from cDNA (Table 1) and cloned  
389 into pGEM-T Easy vector (Promega). The cloned fragments were used as templates for *in vitro*  
390 transcription (MEGAscript, Ambion) of antisense digoxigenin-labeled (Digoxigenin-11-UTP, Roche)  
391 riboprobes.

392 *In situ* hybridization followed (Pang and Martindale, 2008). Riboprobes were used at a final  
393 concentration of ~0.5 ng/ l and hybridized with embryos for 24 hours. After color development, nuclei  
394 were labeled with either DAPI (Molecular Probes) or Hoechst 33342 (Molecular Probes) in 1x PBS.  
395 Embryos were immediately imaged or stored at -20 C in 70% glycerol in 1x PBS. Images were acquired  
396 using a Zeiss Axio Imager.Z2, Zeiss AxioCam MRm Rev3 camera, and Zeiss Zen Blue software.

397 Fluorescent Z-stacks were deconvolved, post-processed for brightness and contrast and assembled in  
398 Adobe Photoshop. Monochrome brightfield images were inverted, pseudo colored and overlaid onto  
399 fluorescent images of labeled nuclei.

400

#### 401 **EdU labeling**

402 Click-iT® EdU Alexa Fluor® 647 Imaging Kit (ThermoFisher Scientific) was used for  
403 identification of proliferating cells. Embryos were collected at different developmental stages and pulse  
404 incubated for 25 minutes with 100 µM EdU in a solution of a 1:1 volumetric ratio of artificial seawater  
405 (FSW) to 6.5% MgCl<sub>2</sub> (dissolved in dH<sub>2</sub>O) at room temperature. The EdU solution was washed out and  
406 embryos were either fixed immediately or allowed to continue to develop during a 24-hour chase and  
407 subsequently fixed. Embryos were fixed with 4% PFA in FSW for 30 minutes at room temperature,  
408 washed with 3% BSA in 1x PBS, and incubated with 0.5% Triton X-100 in 1x PBS for 20 minutes at  
409 room temperature. Fixed embryos were washed with 3% BSA in 1x PBS and stored at 4°C until used for  
410 EdU detection as per manufacturer protocol. Embryos were subsequently washed with 1x PBS and  
411 mounted on glass microscope slides. Images were acquired using a Zeiss Axio Imager.Z2, Zeiss  
412 AxioCam MRm Rev3 camera, and Zeiss Zen Blue software. Fluorescent Z-stacks were deconvolved,  
413 post-processed for brightness and contrast, and assembled in Adobe Photoshop or FIJI (Schindelin et al.,  
414 2012).

415

#### 416 **Preparation and microinjection of embryos**

417 Microinjection needles were pulled with a Brown micropipette puller (P-1000, Sutter Instrument  
418 Company) using filamented aluminosilicate glass capillaries (AF100-64-10, Sutter Instrument Company).  
419 Pulled capillary needles were beveled using a microelectrode beveler (BV-10, Sutter Instrument  
420 Company). Beveling creates a consistent microinjection needle with uniform tip characteristics optimized  
421 for egg penetration and substantially reduces embryo mortality. Beveled capillary needles were loaded via  
422 backfilling with injection cocktails mixed with fluorescently-conjugated dextran (Invitrogen) for rapid  
423 assessment of injection success and subsequent lineage tracing. Loaded capillary needles were mounted to  
424 a Xenoworks microinjection system (Sutter Instrument Company) paired to a Zeiss Discovery V8  
425 epifluorescence stereomicroscope.

426 Microinjection dishes were designed to aid in stabilizing and positioning embryos during  
427 injections. In a 30 mm or 60 mm petri dish, a glass microscope slide was placed at a 30-45° angle. Molten



428 2% agarose (dissolved in 1:1 volume FSW:dH<sub>2</sub>O) was slowly poured into the dish until the agarose  
429 meniscus reached the underside of the angled glass slide. Once the agarose solidified, the glass slide was  
430 removed, creating a molded ramp impression terminating in a 90° trough. For short-term storage of  
431 agarose molds between microinjection sessions, we flooded dishes with 1x Penicillin/Streptomycin:FSW  
432 (PS:FSW), sealed and stored at 4°C.

433 Laboratory cultures of adult *Mnemiopsis leidyi* on a ~12 hr:12 hr light:dark cycle were spawned  
434 ~4 hours post darkness (hpd). At ~3.5 hpd individual adult *M. leidyi* were placed into 8-inch glass bowls  
435 (Carolina Biological Supply) and screened for mature sperm and eggs. Freshly fertilized eggs were  
436 collected by pipette and passed sequentially through a 500 µm and a 400 µm cell strainer (pluriSelect Life  
437 Science) to remove excess mucus and egg jelly. Embryos were then washed with PS:FSW. Ctenophore  
438 vitelline membranes are resistant to penetration from microinjection needles and must be removed.  
439 Additionally, the highly viscous inner egg jelly, which will clog the injection needle, should be removed  
440 from the egg surface. In gelatin-coated dishes filled with PS:FSW, we used acid sharpened tungsten  
441 needles to remove both the vitelline membranes and underlying egg jelly. A 5x gelatin stock (0.5% Knox  
442 unflavored gelatin dissolved in dH<sub>2</sub>O, then formalin added to a final concentration of 0.19%) was diluted  
443 to 1x with dH<sub>2</sub>O, poured into dishes and swirled, and then discarded. Once the gelatin dried, the dishes  
444 were rinsed several times with dH<sub>2</sub>O. Applying a gelatin coating helps prevent devitellinized embryos  
445 from adhering to plastic, glass and metal surfaces. We applied a gelatin coat to glass and plastic dishes,  
446 transfer pipettes, and dissecting needles. Once the vitelline membranes and egg jelly were removed,  
447 embryos were then carefully transferred to an injection dish and positioned along the agarose trough for  
448 microinjection. After injections, embryos were kept at room temperature in gelatin-coated dishes until  
449 reaching the desired development stage for further analyses.

450

#### 451 **Morpholino oligonucleotides**

452 Splice-blocking morpholino oligonucleotides (sbMOs, Gene Tools) were designed for both  
453 *MleKlf5a* (ML00922a) and *MleKlf5b* (ML25776a). *MleKlf5a* sbMO #1 and sbMO #2 targeted intron 2-  
454 exon 3 and intron 3-exon 4 boundaries, respectively. *MleKlf5b* sbMO #1 and sbMO #2 targeted exon 6-  
455 intron 6 and exon 7-intron 7 boundaries, respectively. A standard control MO was used as a negative  
456 control. Sequences of sbMOs are listed in Table 1. Stock solutions of sbMO in dH<sub>2</sub>O were stored at room  
457 temperature. sbMO injection cocktail solutions consisted of a final sbMO concentration of ~333 nM and  
458 ~0.5 mg/ml fluorescent dextran (rhodamine or Alexa-Fluor 488, 10,000 MW, Invitrogen) in 35%

459 glycerol. After phenotypic analyses via vital-dye staining and microscopy, RNA was extracted from  
460 individual embryos (Arcturus PicoPure, ThermoFisher) and cDNA prepared. Gene-specific primers were  
461 used on cDNA (OneTaq One-Step RT-PCR, New England Biolabs) to evaluate aberrant transcript  
462 splicing via gel electrophoresis. A total of 45 embryos were injected with a *MleKlf5a* + *MleKlf5b* double-  
463 gene knockdown sbMO cocktail and used for all downstream analyses.

464

### 465 **CRISPR/Cas9 mutagenesis**

466 We followed a cloning-free method to generate sgRNAs (Kistler et al., 2015; Varshney et al.,  
467 2015). PCR amplified templates were generated by annealing a 20-nt universal tracrRNA oligo to a  
468 sgRNA-specific oligo that consisted of a T7 promoter, followed by the sgRNA target sequence, and a  
469 complementary sequence to the tracrRNA oligo (Table 1). These templates were then *in vitro* transcribed  
470 (MEGAscript, Ambion) to generate sgRNAs. The CasOT program (Xiao et al., 2014) and *M. leidyi*  
471 reference genome (Moreland et al., 2014; Moreland et al., 2020) were used to identify sgRNA target sites  
472 for *MleKlf5a* (*ML00922a*), *MleKlf5b* (*ML25776a*), and *MleKlfX* (*ML20061a*). We selected sgRNAs that  
473 had no fewer than four mismatches to alternative genomic sites to minimize potential off-target site  
474 (OTS) activity (Table 1; Table 2). Recombinant Cas9 protein (PNA Bio) and sgRNAs were injected at  
475 concentrations of 400 ng/μl of Cas9 protein and 100 ng/μl for each sgRNA. A total of 17 embryos from  
476 *MleKlf5a* + *MleKlf5b* double-gene knockout sgRNA/Cas9 cocktail injections were live imaged and  
477 processed for downstream analyses. After phenotypic analysis, genomic DNA was extracted from  
478 individual embryos (QIAamp DNA Micro, Qiagen) and each sgRNA target site was amplified and Sanger  
479 sequenced. The ICE analysis tool (Hsiao et al., 2019 preprint) was used to determine Cas9 efficiency for  
480 each sgRNA. ICE analysis gives two scores: an ICE score which reflects the percentage of indels found  
481 and a KO score which reflects the percentage of indels that produce a frameshift mutation. We obtained  
482 ICE/sequencing information and analyzed off target sites from all 17 embryos for *MleKlf5b* cut sites and  
483 14 of the 17 embryos for *MleKlf5a* cut sites. Additional single-gene injection analyses, either *MleKlf5a* or  
484 *MleKlf5b*, were performed on five embryos per gene.

485

### 486 **Phenotypic analysis through vital dye staining**

487 Control, sbMO, and Cas9 injected embryos at 20-24 hpf were incubated in filtered seawater  
488 (FSW) containing a final concentration of 100 nM MitoTracker (Deep Red FM, Molecular Probes), 100  
489 nM LysoTracker (Red DND-99, Molecular Probes), and 10 ng/μl Hoechst 33342 for one hour at room

490 temperature. The live embryos were then placed on glass slides in a drop of FSW and relaxed with a drop  
491 of 6.5% MgCl<sub>2</sub> (in dH<sub>2</sub>O) on a coverslip positioned with clay feet for imaging. DIC and fluorescent  
492 images were acquired using a Zeiss Axio Imager.Z2, Zeiss AxioCam MRm Rev3 camera, and Zeiss Zen  
493 Blue software. Fluorescent Z-stacks were deconvolved, post-processed for brightness and contrast, and  
494 assembled in Adobe Photoshop.

495

#### 496 **Epidermal nuclei counts**

497 A subset of live images from wildtype, KLF-MO, and KLF-Cas9 embryos were used (see  
498 previous section) to quantitate epidermal nuclei. Individual Z-sections from Hoechst channels were  
499 focused on the outer epidermal layer for each embryo oriented along the tentacular axis (TA). A 100 μm<sup>2</sup>  
500 region of interest (roi) was positioned medially and oral of the ctene rows. Nuclei within the roi were  
501 manually counted. Nuclei counts were quantified and plotted using R  
502 (<http://shiny.chemgrid.org/boxplotr/>).

503

#### 504 **ACKNOWLEDGEMENTS**

505 This work was supported in part by startup funds from the University of Miami College of Arts and  
506 Sciences to WEB. JSP was supported by the University of Miami College of Arts and Sciences. We thank  
507 Ricardo Cepeda for additional animal support and anonymous reviewers for their time and generous  
508 feedback.

509

#### 510 **AUTHOR CONTRIBUTIONS**

511 WEB originally conceived the study and designed the research. JSP and WEB performed experiments,  
512 collected and analyzed data, and wrote the manuscript. JSP and WEB read and approved the final  
513 manuscript.

514

#### 515 **AUTHOR INFORMATION**

516 Correspondence and requests for materials should be addressed to WEB. ([w.browne@miami.edu](mailto:w.browne@miami.edu))

517

518 **Competing financial interests:** The authors declare no competing financial interests.

#### 519 **References**

- 520 Alié, A., Leclère, L., Jager, M., Dayraud, C., Chang, P., Le Guyader, H., Quéinnec, E. and Manuel,  
521 M. (2011). Somatic stem cells express *Piwi* and *Vasa* genes in an adult ctenophore: Ancient  
522 association of “germline genes” with stemness. *Dev. Biol.* **350**, 183–197.
- 523 Alié, A., Hayashi, T., Sugimura, I., Manuel, M., Sugano, W., Mano, A., Satoh, N., Agata, K. and  
524 Funayama, N. (2015). The ancestral gene repertoire of animal stem cells. *Proc. Natl. Acad. Sci. U.*  
525 *S. A.* **112**, E7093–100.
- 526 Anctil, M. (1985). Ultrastructure of the luminescent system of the ctenophore *Mnemiopsis leidyi*. *Cell*  
527 *Tissue Res.* **242**, 333–340.
- 528 Babonis, L. S., DeBiase, M. B., Francis, W. R., Christianson, L. M., Moss, A. G., Haddock, S. H.  
529 D., Martindale, M. Q. and Ryan, J. F. (2018). Integrating embryonic development and  
530 evolutionary history to characterize tentacle-specific cell types in a ctenophore. *Mol. Biol. Evol.* **35**,  
531 2940–2956.
- 532 Bessho-Uehara, M., Huang, W., Patry, W. L., Browne, W. E., Weng, J.-K. and Haddock, S. H. D.  
533 (2020). Evidence for de novo Biosynthesis of the Luminous Substrate Coelenterazine in  
534 Ctenophores. *iScience* **23**, 101859.
- 535 Bialkowska, A. B., Yang, V. W. and Mallipattu, S. K. (2017). Krüppel-like factors in mammalian stem  
536 cells and development. *Development* **144**, 737–754.
- 537 Blakeley, P., Fogarty, N. M. E., Del Valle, I., Wamaitha, S. E., Hu, T. X., Elder, K., Snell, P.,  
538 Christie, L., Robson, P. and Niakan, K. K. (2015). Defining the three cell lineages of the human  
539 blastocyst by single-cell RNA-seq. *Development* **142**, 3613.
- 540 Davidson, P. L., Koch, B. J., Schnitzler, C. E., Henry, J. Q., Martindale, M. Q., Baxevanis, A. D.  
541 and Browne, W. E. (2017). The maternal-zygotic transition and zygotic activation of the  
542 *Mnemiopsis leidyi* genome occurs within the first three cleavage cycles. *Mol. Reprod. Dev.* **84**,  
543 1218–1229.
- 544 De Graeve, F., Smaldone, S., Laub, F., Mlodzik, M., Bhat, M. and Ramirez, F. (2003). Identification  
545 of the *Drosophila* progenitor of mammalian Krüppel-like factors 6 and 7 and a determinant of fly  
546 development. *Gene* **314**, 55–62.
- 547 DuBuc, T. Q., Schnitzler, C. E., Chrysostomou, E., McMahon, E. T., Febrimarsa, Gahan, J. M.,  
548 Buggie, T., Gornik, S. G., Hanley, S., Barreira, S. N., et al. (2020). Transcription factor AP2  
549 controls cnidarian germ cell induction. *Science* **367**, 757–762.
- 550 Dunn, C. W., Hejnol, A., Matus, D. Q., Pang, K., Browne, W. E., Smith, S. A., Seaver, E., Rouse, G.  
551 W., Obst, M., Edgecombe, G. D., et al. (2008). Broad phylogenomic sampling improves resolution  
552 of the animal tree of life. *Nature* **452**, 745–749.
- 553 Fischer, A. H., Pang, K., Henry, J. Q. and Martindale, M. Q. (2014). A cleavage clock regulates  
554 features of lineage-specific differentiation in the development of a basal branching metazoan, the  
555 ctenophore *Mnemiopsis leidyi*. *Evodevo* **5**, 4.
- 556 Freeman, G. (1976). The effects of altering the position of cleavage planes on the process of localization  
557 of developmental potential in ctenophores. *Dev. Biol.* **51**, 332–337.
- 558 Freeman, G. and Reynolds, G. T. (1973). The development of bioluminescence in the ctenophore

- 559 *Mnemiopsis leidyi*. *Dev. Biol.* **31**, 61–100.
- 560 **Gao, Y., Cao, Q., Lu, L., Zhang, X., Zhang, Z., Dong, X., Jia, W. and Cao, Y.** (2015). Kruppel-like  
561 factor family genes are expressed during *Xenopus* embryogenesis and involved in germ layer  
562 formation and body axis patterning. *Dev. Dyn.* **244**, 1328–1346.
- 563 **Hejnol, A., Obst, M., Stamatakis, A., Ott, M., Rouse, G. W., Edgecombe, G. D., Martinez, P.,**  
564 **Baguña, J., Bailly, X., Jondelius, U., et al.** (2009). Assessing the root of bilaterian animals with  
565 scalable phylogenomic methods. *Proc. Biol. Sci.* **276**, 4261–4270.
- 566 **Hemrich, G., Khalturin, K., Boehm, A.-M., Puchert, M., Anton-Erxleben, F., Wittlieb, J.,**  
567 **Klostermeier, U. C., Rosenstiel, P., Oberg, H.-H., Domazet-Lošo, T., et al.** (2012). Molecular  
568 signatures of the three stem cell lineages in hydra and the emergence of stem cell function at the base  
569 of multicellularity. *Mol. Biol. Evol.* **29**, 3267–3280.
- 570 **Henry, J. Q. and Martindale, M. Q.** (2001). Multiple inductive signals are involved in the development  
571 of the ctenophore *Mnemiopsis leidyi*. *Dev. Biol.* **238**, 40–46.
- 572 **Henry, J. Q. and Martindale, M. Q.** (2004). Inductive interactions and embryonic equivalence groups in  
573 a basal metazoan, the ctenophore *Mnemiopsis leidyi*. *Evol. Dev.* **6**, 17–24.
- 574 **Horridge, G. A.** (1964a). Presumed photoreceptive cilia in a ctenophore. *Quart J Micr Sci* **105**, 311–317.
- 575 **Horridge, G. A.** (1964b). The giant mitochondria of ctenophore comb-plates. *Quart J Micr Sci* **105**, 301–  
576 310.
- 577 **Hoshijima, K., Juryneć, M. J., Klatt Shaw, D., Jacobi, A. M., Behlke, M. A. and Grunwald, D. J.**  
578 (2019). Highly Efficient CRISPR-Cas9-Based Methods for Generating Deletion Mutations and F0  
579 Embryos that Lack Gene Function in Zebrafish. *Dev. Cell* **51**, 645–657.e4.
- 580 **Hsiao, T., Conant, D., Rossi, N., Maures, T., Waite, K., Yang, J., Joshi, S., Kelso, R., Holden, K.,**  
581 **Enzmann, B. L., et al.** (2019). Inference of CRISPR Edits from Sanger Trace Data. *bioRxiv*  
582 doi:10.1101/251082.
- 583 **Ilsley, M. D., Gillinder, K. R., Magor, G. W., Huang, S., Bailey, T. L., Crossley, M. and Perkins, A.**  
584 **C.** (2017). Krüppel-like factors compete for promoters and enhancers to fine-tune transcription.  
585 *Nucleic Acids Res.* **45**, 6572–6588.
- 586 **Jager, M., Quéinnec, E., Chiori, R., Le Guyader, H. and Manuel, M.** (2008). Insights into the early  
587 evolution of SOX genes from expression analyses in a ctenophore. *J. Exp. Zool. B Mol. Dev. Evol.*  
588 **310**, 650–667.
- 589 **Jiang, J., Chan, Y.-S., Loh, Y.-H., Cai, J., Tong, G.-Q., Lim, C.-A., Robson, P., Zhong, S. and Ng,**  
590 **H.-H.** (2008). A core Klf circuitry regulates self-renewal of embryonic stem cells. *Nat. Cell Biol.* **10**,  
591 353–360.
- 592 **Jokura, K., Shibata, D., Yamaguchi, K., Shiba, K., Makino, Y., Shigenobu, S. and Inaba, K.** (2019).  
593 CTENO64 Is Required for Coordinated Paddling of Ciliary Comb Plate in Ctenophores. *Curr. Biol.*  
594 **29**, 3510–3516.e4.
- 595 **Jokura, K. and Inaba, K.** (2020). Structural diversity and distribution of cilia in the apical sense organ  
596 of the ctenophore *Bolinopsis mikado*. *Cytoskeleton* **77**, 442–455.

- 597 **Juliano, C. E., Swartz, S. Z. and Wessel, G. M.** (2010). A conserved germline multipotency program.  
598 *Development* **137**, 4113–4126.
- 599 **Kapli, P. and Telford, M. J.** (2020). Topology-dependent asymmetry in systematic errors affects  
600 phylogenetic placement of Ctenophora and Xenacoelomorpha. *Sci Adv* **6**.
- 601 **Kistler, K. E., Vosshall, L. B. and Matthews, B. J.** (2015). Genome engineering with CRISPR-Cas9 in  
602 the mosquito *Aedes aegypti*. *Cell Rep.* **11**, 51–60.
- 603 **Kult, S., Olender, T., Osterwalder, M., Markman, S., Leshkowitz, D., Krief, S., Blecher-Gonen, R.,**  
604 **Ben-Moshe, S., Farack, L., Keren-Shaul, H., et al.** (2021). Bi-fated tendon-to-bone attachment  
605 cells are regulated by shared enhancers and KLF transcription factors. *Elife* **10**.
- 606 **Kuruvilla, J. G., Ghaleb, A. M., Bialkowska, A. B., Nandan, M. O. and Yang, V. W.** (2015). Role of  
607 Krüppel-like factor 5 in the maintenance of the stem cell niche in the intestinal crypt. *Stem Cell*  
608 *Transl Investig* **2**.
- 609 **Levy, S., Elek, A., Grau-Bové, X., Menéndez-Bravo, S., Iglesias, M., Taney, A., Mass, T., and Sebé-**  
610 **Pedrés, A.** (2021). A stony coral cell atlas illuminates the molecular and cellular basis of coral  
611 symbiosis, calcification, and immunity. *Cell* **184**, 1-15.
- 612 **Li, Y., Shen, X.-X., Evans, B., Dunn, C. W., and Rokas, A.** (2021). Rooting the animal tree of life.  
613 *Molecular Biology and Evolution* msab170.
- 614 **Lynch, M. and Conery, J. S.** (2000). The evolutionary fate and consequences of duplicate genes. *Science*  
615 **290**, 1151–1155.
- 616 **Martindale, M. Q. and Henry, J. Q.** (1997a). Reassessing embryogenesis in the Ctenophora: the  
617 inductive role of e1 micromeres in organizing ctene row formation in the “mosaic” embryo,  
618 *Mnemiopsis leidyi*. *Development* **124**, 1999–2006.
- 619 **Martindale, M. Q. and Henry, J. J.** (1997b). Experimental Analysis of Tentacle Formation in the  
620 Ctenophore *Mnemiopsis leidyi*. *Biol. Bull.* **193**, 245–247.
- 621 **Martindale, M. Q. and Henry, J. Q.** (1999). Intracellular fate mapping in a basal metazoan, the  
622 ctenophore *Mnemiopsis leidyi*, reveals the origins of mesoderm and the existence of indeterminate  
623 cell lineages. *Dev. Biol.* **214**, 243–257.
- 624 **Martindale, M. Q. and Henry, J. Q.** (2015). Ctenophora. In *Evolutionary Developmental Biology of*  
625 *Invertebrates I: Introduction, Non-Bilateria, Acoelomorpha, Xenoturbellida, Chaetognatha* (ed.  
626 Wanninger, A.), pp. 179–201. Vienna: Springer Vienna.
- 627 **McConnell, B. B. and Yang, V. W.** (2010). Mammalian Krüppel-like factors in health and diseases.  
628 *Physiol. Rev.* **90**, 1337–1381.
- 629 **McConnell, B. B., Kim, S. S., Yu, K., Ghaleb, A. M., Takeda, N., Manabe, I., Nusrat, A., Nagai, R.**  
630 **and Yang, V. W.** (2011). Krüppel-like factor 5 is important for maintenance of crypt architecture  
631 and barrier function in mouse intestine. *Gastroenterology* **141**, 1302–13.
- 632 **McCulloch, K. J. and Koenig, K. M.** (2020). Krüppel-like factor/specificity protein evolution in the  
633 Spiralia and the implications for cephalopod visual system novelties. *Proc. Biol. Sci.* **287**, 20202055.
- 634 **Moore, D. L., Blackmore, M. G., Hu, Y., Kaestner, K. H., Bixby, J. L., Lemmon, V. P. and**



- 635 **Goldberg, J. L.** (2009). KLF family members regulate intrinsic axon regeneration ability. *Science*  
636 **326**, 298–301.
- 637 **Moreland, R. T., Nguyen, A.-D., Ryan, J. F., Schnitzler, C. E., Koch, B. J., Siewert, K., Wolfsberg,**  
638 **T. G. and Baxevanis, A. D.** (2014). A customized Web portal for the genome of the ctenophore  
639 *Mnemiopsis leidyi*. *BMC Genomics* **15**, 316.
- 640 **Moreland, R. T., Nguyen, A.-D., Ryan, J. F. and Baxevanis, A. D.** (2020). The *Mnemiopsis* Genome  
641 Project Portal: integrating new gene expression resources and improving data visualization.  
642 *Database* **2020**, baaa029.
- 643 **Moroz, L. L., Kocot, K. M., Citarella, M. R., Dosung, S., Norekian, T. P., Povolotskaya, I. S.,**  
644 **Grigorenko, A. P., Dailey, C., Berezikov, E., Buckley, K. M., et al.** (2014). The ctenophore  
645 genome and the evolutionary origins of neural systems. *Nature* **510**, 109–114.
- 646 **Musser, J. M., Schippers, K. J., Nickel, M. and Mizzon, G.** (2019). Profiling cellular diversity in  
647 sponges informs animal cell type and nervous system evolution. *bioRxiv* doi:10.1101/758276.
- 648 **Nagai, R., Friedman, S. L. and Kasuga, M. eds.** (2009). *The Biology of Krüppel-like Factors*. Springer,  
649 Tokyo.
- 650 **Nakanishi, N., Sogabe, S. and Degan, B. M.** (2014). Evolutionary origin of gastrulation: insights from  
651 sponge development. *BMC Biol.* **12**, 26.
- 652 **Nandan, M. O., Ghaleb, A. M., Bialkowska, A. B. and Yang, V. W.** (2015). Krüppel-like factor 5 is  
653 essential for proliferation and survival of mouse intestinal epithelial stem cells. *Stem Cell Res.* **14**,  
654 10–19.
- 655 **Oishi, Y. and Manabe, I.** (2018). Krüppel-Like Factors in Metabolic Homeostasis and Cardiometabolic  
656 Disease. *Front Cardiovasc Med* **5**, 69.
- 657 **Pang, K. and Martindale, M. Q.** (2008). Ctenophore whole-mount in situ hybridization. *CSH Protoc.*  
658 **2008**, db.prot5087.
- 659 **Parisi, S., Passaro, F., Aloia, L., Manabe, I., Nagai, R., Pastore, L. and Russo, T.** (2008). Klf5 is  
660 involved in self-renewal of mouse embryonic stem cells. *J. Cell Sci.* **121**, 2629–2634.
- 661 **Parisi, S., Cozzuto, L., Tarantino, C., Passaro, F., Ciriello, S., Aloia, L., Antonini, D., De Simone, V.,**  
662 **Pastore, L. and Russo, T.** (2010). Direct targets of Klf5 transcription factor contribute to the  
663 maintenance of mouse embryonic stem cell undifferentiated state. *BMC Biol.* **8**, 128.
- 664 **Pearson, R., Fleetwood, J., Eaton, S., Crossley, M. and Bao, S.** (2008). Krüppel-like transcription  
665 factors: a functional family. *Int. J. Biochem. Cell Biol.* **40**, 1996–2001.
- 666 **Presnell, J. S., Schnitzler, C. E. and Browne, W. E.** (2015). KLF/SP Transcription Factor Family  
667 Evolution: Expansion, Diversification, and Innovation in Eukaryotes. *Genome Biol. Evol.* **7**, 2289–  
668 2309.
- 669 **Presnell, J. S., Vandepas, L. E., Warren, K. J., Swalla, B. J., Amemiya, C. T. and Browne, W. E.**  
670 (2016). The Presence of a Functionally Tripartite Through-Gut in Ctenophora Has Implications for  
671 Metazoan Character Trait Evolution. *Curr. Biol.* **26**, 2814–2820.
- 672 **Reitzel, A. M., Pang, K. and Martindale, M. Q.** (2016). Developmental expression of “germline”- and

- 673 “sex determination”-related genes in the ctenophore *Mnemiopsis leidyi*. *Evodevo* **7**, 17.
- 674 **Ryan, J. F., Pang, K., Schnitzler, C. E., Nguyen, A.-D., Moreland, R. T., Simmons, D. K., Koch, B.**  
675 **J., Francis, W. R., Havlak, P., NISC Comparative Sequencing Program, et al.** (2013). The  
676 genome of the ctenophore *Mnemiopsis leidyi* and its implications for cell type evolution. *Science*  
677 **342**, 1242592.
- 678 **Salinas-Saavedra, M. and Martindale, M. Q.** (2020). Par protein localization during the early  
679 development of *Mnemiopsis leidyi* suggests different modes of epithelial organization in the  
680 metazoa. *Elife* **9**, e54927.
- 681 **Schindelin, J., Arganda-Carreras, I., Frise, E., Kaynig, V., Longair, M., Pietzsch, T., Preibisch, S.,**  
682 **Rueden, C., Saalfeld, S., Schmid, B., et al.** (2012). Fiji: an open-source platform for biological-  
683 image analysis. *Nature Methods* **9**, 676–682.
- 684 **Schnitzler, C. E., Pang, K., Powers, M. L., Reitzel, A. M., Ryan, J. F., Simmons, D., Tada, T., Park,**  
685 **M., Gupta, J., Brooks, S. Y., et al.** (2012). Genomic organization, evolution, and expression of  
686 photoprotein and opsin genes in *Mnemiopsis leidyi*: a new view of ctenophore photocytes. *BMC*  
687 *Biol.* **10**, 107.
- 688 **Schnitzler, C. E., Simmons, D. K., Pang, K., Martindale, M. Q. and Baxevanis, A. D.** (2014).  
689 Expression of multiple *Sox* genes through embryonic development in the ctenophore *Mnemiopsis*  
690 *leidyi* is spatially restricted to zones of cell proliferation. *Evodevo* **5**, 15.
- 691 **Sebé-Pedrós, A., Saudemont, B., Chomsky, E., Plessier, F., Mailhé, M.-P., Renno, J., Loe-Mie, Y.,**  
692 **Lifshitz, A., Mukamel, Z., Schmutz, S., et al.** (2018a). Cnidarian Cell Type Diversity and  
693 Regulation Revealed by Whole-Organism Single-Cell RNA-Seq. *Cell* **173**, 1520–1534.e20.
- 694 **Sebé-Pedrós, A., Chomsky, E., Pang, K., Lara-Astiaso, D., Gaiti, F., Mukamel, Z., Amit, I., Hejnl,**  
695 **A., Degan, B. M. and Tanay, A.** (2018b). Early metazoan cell type diversity and the evolution of  
696 multicellular gene regulation. *Nat Ecol Evol* **2**, 1176–1188.
- 697 **Shen, X.-X., Hittinger, C. T. and Rokas, A.** (2017). Contentious relationships in phylogenomic studies  
698 can be driven by a handful of genes. *Nat Ecol Evol* **1**, 126.
- 699 **Siebert, S., Farrell, J. A., Cazet, J. F., Abeykoon, Y., Primack, A. S., Schnitzler, C. E. and Juliano,**  
700 **C. E.** (2019). Stem cell differentiation trajectories in *Hydra* resolved at single-cell resolution.  
701 *Science* **365**, eaav9314.
- 702 **Sogabe, S., Hatleberg, W. L., Kocot, K. M., Say, T. E., Stoupin, D., Roper, K. E., Fernandez-**  
703 **Valverde, S. L., Degan, S. M. and Degan, B. M.** (2019). Pluripotency and the origin of animal  
704 multicellularity. *Nature* **570**, 519–522.
- 705 **Sweet, D. R., Fan, L., Hsieh, P. N. and Jain, M. K.** (2018). Krüppel-Like Factors in Vascular  
706 Inflammation: Mechanistic Insights and Therapeutic Potential. *Front Cardiovasc Med* **5**, 6.
- 707 **Tamm, S. L.** (1973). Mechanisms of Ciliary Co-Ordination in Ctenophores. *J. Exp. Biol.* **59**, 231–245.
- 708 **Tamm, S. L.** (2012). Patterns of comb row development in young and adult stages of the ctenophores  
709 *Mnemiopsis leidyi* and *Pleurobrachia pileus*. *J. Morphol.* **273**, 1050–1063.
- 710 **Tamm, S. L.** (2014). Formation of the statolith in the ctenophore *Mnemiopsis leidyi*. *Biol. Bull.* **227**, 7–  
711 18.

- 712 **Tarashansky, A. J., Musser, J. M., Khariton, M., Li, P., Arendt, D., Quake, S. R., and Wang, B.**  
713 (2021). Mapping single-cell atlases throughout Metazoa unravels cell type evolution. *eLife* **10**,  
714 e66747.
- 715 **Varshney, G. K., Pei, W., LaFave, M. C., Idol, J., Xu, L., Gallardo, V., Carrington, B., Bishop, K.,**  
716 **Jones, M., Li, M., et al.** (2015). High-throughput gene targeting and phenotyping in zebrafish using  
717 CRISPR/Cas9. *Genome Res.* **25**, 1030–1042.
- 718 **Weber, U., Rodriguez, E., Martignetti, J. and Mlodzik, M.** (2014). Luna, a Drosophila KLF6/KLF7, is  
719 maternally required for synchronized nuclear and centrosome cycles in the preblastoderm embryo.  
720 *PLoS One* **9**, e96933.
- 721 **Whelan, N. V., Kocot, K. M., Moroz, T. P., Mukherjee, K., Williams, P., Paulay, G., Moroz, L. L.**  
722 **and Halanych, K. M.** (2017). Ctenophore relationships and their placement as the sister group to all  
723 other animals. *Nat Ecol Evol* **1**, 1737–1746.
- 724 **Wu, R. S., Lam, I. I., Clay, H., Duong, D. N., Deo, R. C. and Coughlin, S. R.** (2018a). A Rapid  
725 Method for Directed Gene Knockout for Screening in G0 Zebrafish. *Dev. Cell* **46**, 112–125.
- 726 **Wu, X., Chen, Z., Gao, Y., Wang, L., Sun, X., Jin, Y. and Liu, W.** (2018b). The krüppel-like factor  
727 Dar1 restricts the proliferation of Drosophila intestinal stem cells. *FEBS J.* **285**, 3945–3958.
- 728 **Xiao, A., Cheng, Z., Kong, L., Zhu, Z., Lin, S., Gao, G. and Zhang, B.** (2014). CasOT: a genome-wide  
729 Cas9/gRNA off-target searching tool. *Bioinformatics* **30**, 1180–1182.
- 730 **Yamada, A., Martindale, M. Q., Fukui, A. and Tochinai, S.** (2010). Highly conserved functions of the  
731 *Brachyury* gene on morphogenetic movements: insight from the early-diverging phylum Ctenophora.  
732 *Dev. Biol.* **339**, 212–222.
- 733

734 **Figure Legends**

735 **Fig 1. Zygotic *MleKlf5a* and *MleKlf5b* are primarily expressed in endodermally derived tissues**

736 **during embryogenesis in *Mnemiopsis leidyi*.** (A) Schematics highlighting major morphological  
737 landmarks (e.g., ctene rows, pharynx, tentacle bulbs, apical organ) during *M. leidyi* embryogenesis.  
738 Gastrulation typically occurs within 6 hours post-fertilization (hpf), followed by rapid tissue remodeling  
739 and organogenesis over the next several hours. By 24 hpf embryos are ready to hatch as cydippid larvae  
740 and have fully developed organ systems. For post-gastrulation embryos, the top row is an aboral view and  
741 the bottom row is a lateral view with oral up and aboral down. (B-Q) Whole-mount *in situ* hybridization  
742 for *MleKlf5a* in B,C,F,G,J,K,N,O and *MleKlf5b* in D,E,H,I,L,M,P,Q during embryogenesis. Orientation  
743 follows schematics from A. Aboral views in C, E, F, H, J, L, N, P. Lateral views in D, G, I, K, M, O, Q.  
744 (B-E) Maternal transcripts for both *MleKlf5a* and *MleKlf5b* are ubiquitously distributed during early  
745 development in zygotes (B), early cleavage stages (D) and gastrulae (C,E). One representative image for  
746 each gene per stage is shown. (F-Q) Zygotic *MleKlf5a* and *MleKlf5b* transcript expression domains with  
747 corresponding schematics. (F-I) Initially, expression of *MleKlf5a* and *MleKlf5b* zygotic transcripts are  
748 localized to the forming tentacular median ridges (arrowheads) and the developing pharynx (oph + aph).  
749 (J-M) Later in development, *MleKlf5a* and *MleKlf5b* transcript expression are also found in the  
750 developing apical organ (arrows) and epithelia of the newly formed gastrovascular cavity (gvc). (N-Q) In  
751 cydippids, *MleKlf5a* and *MleKlf5b* transcripts are found in the tentacular median ridge (arrowheads) and  
752 lateral ridge (lr), on either side of the apical organ floor (arrows), localized towards the aboral end of the  
753 pharynx (aph), and throughout the gastrovascular cavity epithelium (gvc). (L, P) *MleKlf5b* transcripts are  
754 also expressed in an additional domain around the ctene rows (asterisks). See also Fig. S1A-B. Scale bars:  
755 50  $\mu$ m. aph, aboral end of the pharynx; gvc, gastrovascular cavity; lr, lateral ridge; oph, oral end of the  
756 pharynx; PA, pharyngeal axis; TA, tentacular axis.

757

758 **Fig 2. Validation of independent methods used to abrogate *MleKlf5a* and *MleKlf5b* gene function.**

759 *MleKlf5a* (A) and *MleKlf5b* (E) exon-intron schematics show the location of splice-blocking morpholino  
760 oligonucleotide (sbMO) targets (blue boxes) and single-guide RNA (sgRNA) targets (black triangles)  
761 used in this study. The orange bars indicate the location of the DNA binding domain. (B, F)  
762 Electrophoretic gels of PCR products obtained using different sets of *MleKlf5a* and *MleKlf5b* sbMO RT-  
763 PCR primers on cDNA obtained from a single individual KLF-MO embryo exemplar (left) and control  
764 embryo exemplar (right). Schematics to the right of the gel images highlight examples of wildtype (wt)

765 amplicon, exon-skipping (-E) and/or intron retention (+I) amplicons captured with primers for each gene  
766 (Table 1). **(B)** *MleKlf5a*-MO gel: 2-log DNA ladder (L) used for band size reference, unlabeled lanes are  
767 not relevant to this study. Lane 1 shows both a 960 bp wt and a 860 bp third exon-skipped (-E3) *MleKlf5a*  
768 amplicon. Lane 2 shows a ~3 kb third intron retention (+I3) *MleKlf5a* amplicon. Control gel: 2-log DNA  
769 ladder (L) used for band size reference. Lane 1 shows a single 960 bp wt *MleKlf5a* amplicon. **(F)**  
770 *MleKlf5b*-MO gel: 2-log DNA ladder (L) used for band size reference. Lane 1 shows both a 480 bp wt  
771 and a 430 bp sixth exon-skipped (-E6) *MleKlf5b* amplicon. Lane 2 shows a ~1.2 kb seventh intron-  
772 retained (+I7) *MleKlf5b* amplicon. Control gel: 2-log DNA ladder (L) used for band size reference. Lane  
773 1 shows a single 480 bp wt *MleKlf5b* amplicon. Wildtype (wt) and mis-spliced transcripts due to -E  
774 and/or +I were present in KLF-MO embryos ( $n = 21$  KLF-MO embryos). **(C-G)** Discordance plots  
775 produced using ICE software show elevated sequence discordance downstream of predicted Cas9 cut sites  
776 relative to control genomic sequence. **(D, H)** Corresponding Sanger sequence traces from genomic DNA  
777 extracted from a single individual exemplar KLF-Cas9 embryo show signal degradation downstream of  
778 the Cas9 cut site as compared to a single individual exemplar wildtype embryo ( $n = 17$  KLF-Cas9  
779 embryos). Sanger sequencing signal degradation is caused by the introduction of indels in KLF-Cas9  
780 embryos. The sgRNA target sites are underlined, the position of the predicted Cas9 cut sites are  
781 represented by a vertical dashed line.

782

783 **Fig 3. Phenotypes generated by *MleKlf5a* and *MleKlf5b* double gene knockdown via sbMO and**  
784 ***sgRNA*-Cas9 genome editing. (A)** Representative schematics (see **Fig. 1A**) of wildtype, mild and severe  
785 phenotypes highlighting tissues and cell types disrupted in KLF-MO and KLF-Cas9 *M. leidyi* embryos.  
786 The top row is an aboral view. The bottom row is a lateral view with oral up and aboral down. **(B-Q)**  
787 Representative live images of ~20 hpf cydippids. Aboral view in **B, D, F, H, J, L, N, P**. Lateral view, oral  
788 up, in **C, E, G, I, K, M, O, Q**. Schematic depiction of tentacular axis (TA) and pharyngeal axis (PA)  
789 orientation are located in panel upper right. **(B, C)** Un-injected wildtype embryo. Hoechst (blue) marks  
790 nuclei. MitoTracker (red) preferentially marks the position of ctene row polster cells, one pair per  
791 embryonic quadrant. Lysotracker (yellow) preferentially stains epithelial cells lining the gastrovascular  
792 cavity (gvc). Tentacular median ridges (arrowheads) are positioned medially along the tentacular axis and  
793 contacted by gvc epithelial cells. The pharynx (ph) is positioned centrally and joins with the gvc aborally.  
794 The apical organ (arrow) is located at the aboral pole of the embryo. Morphology is unaffected in  
795 embryos sham injected with control morpholino (MO) **(D, E)**, *sgRNA* only **(J, K)** or Cas9 protein only **(L,**

796 **M**). In contrast, mild phenotypes in double gene knockdown KLF-MO embryos (**F, G**) and double gene  
797 edited KLF-Cas9 embryos (**N, O**) display aberrant distributions of *gvc* epithelial cells (Lysotracker  
798 signal), aberrant patterning of the pharynx (ph) including aboral bifurcations (**G, O**; refer to Fig. S4),  
799 aberrant patterning of the tentacle bulb and tentacular median ridges (arrowheads), and atypical apical  
800 organ (arrow) morphology. Severe phenotypes in double gene knockdown KLF-MO embryos (**H, I**) and  
801 double gene edited KLF-Cas9 embryos (**P, Q**) are reduced in size due to lack of mesoglea ECM  
802 extrusion, display collapsed pharynx with *gvc* junction defects, significantly reduced tentacle bulbs and  
803 tentacular median ridges (arrowheads), and apical organ defects (arrow). Scale bars: 50  $\mu$ m; aph, ph,  
804 pharynx; PA, pharyngeal axis; TA, tentacular axis.

805

806 **Fig 4. *MleKlf5a* and *MleKlf5b* double gene knockdown disrupts the development of endodermally**  
807 **derived cell types and structures including lithocytes and the tentacular median ridge.** Live images  
808 of embryos at ~20 hpf. Schematic depiction of tentacular axis (TA) and pharyngeal axis (PA) orientation  
809 are located in panel upper right. Aboral view in **A, C, E, H, J, L**. Lateral view, oral up, in **B, D, F, I, K,**  
810 **M, O-S**. (**A, B**) Wildtype embryo with view of the apical organ (ao) showing position of lithocytes  
811 (arrow) and dome cilia (arrowhead). (**C, D**) Representative double gene knockdown KLF-MO embryo  
812 and (**E, F**) representative double gene edited KLF-Cas9 embryo lacking lithocytes. Dome cilia  
813 (arrowheads) and balancer cilia are present in both KLF-MO and KLF-Cas9 embryos. (**G**) Quantification  
814 of lithocyte production. *MleKlf5a* and *MleKlf5b* double gene knockdown significantly reduces lithocyte  
815 production. Centerlines show the medians; box limits indicate the 25th and 75th percentiles; whiskers  
816 extend 1.5 times the interquartile range from the 25th and 75th percentiles; \* = two-tailed *t*-test,  $t = 3.47$ ,  
817  $p < 0.005$ ; \*\* = two-tailed *t*-test,  $t = 6.52$ ,  $p < 0.00001$ . Individual counts are plotted as black dots where  $n =$   
818 14, 33, and 15 embryos, respectively. (**H, I**) Wildtype tentacular median ridge (arrowhead) and lateral  
819 ridge (lr). (**J, K**) Representative double gene knockdown KLF-MO embryo and (**L, M**) representative  
820 double gene-edited KLF-Cas9 embryo with dramatically reduced tentacular median ridge. The tentacle  
821 bulb lateral ridge remains present in both KLF-MO and KLF-Cas9 embryos. (**N**) Quantification of  
822 tentacular median ridge width. *MleKlf5a* and *MleKlf5b* double gene knockdown significantly reduces  
823 tentacular median ridge width. Centerlines show the medians; box limits indicate the 25th and 75th  
824 percentiles; whiskers extend 1.5 times the interquartile range from the 25th and 75th percentiles; \* = two-  
825 tailed *t*-test,  $t = 4.01$ ,  $p < 0.0005$ ; \*\* = two-tailed *t*-test,  $t = 8.32$ ,  $p < 0.00001$ . Individual measurements are  
826 plotted as black dots where  $n = 28, 61, \text{ and } 34$  tentacular median ridge widths, respectively. Each



827 measurement represents a single tentacular median ridge width, with a maximum of 2 from each embryo  
828 (i.e., an individual embryo has two tentacular median ridges, thus each embryo may contribute 2  
829 tentacular median ridge width measurements). A measurement of 0 indicates the absence of a tentacular  
830 median ridge and/or tentacle bulb. **(O-S)** Representative images from a subset of each group of embryos  
831 with a 100  $\mu\text{m}^2$  region of interest focused on the outer epidermal cell layer of wildtype **(O)**, KLF-MO  
832 mild **(P)** and severe **(Q)**, and KLF-Cas9 mild **(R)**, and severe **(S)** embryos. **(T)** Quantification of  
833 epidermal nuclei cell counts. Centerlines show the medians; box limits indicate the 25th and 75th  
834 percentiles; whiskers extend 1.5 times the interquartile range from the 25th and 75th percentiles; crosses  
835 represent sample means; \* = two-tailed *t*-test,  $t = -5.35225$ ,  $p < .005$ ; \*\* = two-tailed *t*-test,  $t = -4.99757$ ,  
836  $p < .005$ . Area nuclei counts are plotted as black dots where  $n = 5, 5, 4, 5$ , and 5 area count samples  
837 respectively. KLF-MO severe ( $M = 100.40$ ,  $SD = 10.7$ ) and KLF-Cas9 severe ( $M = 106.40$ ,  $SD = 17.4$ )  
838 both had a significantly higher density of epidermal nuclei counts per 100  $\mu\text{m}^2$  area than control embryos  
839 ( $M = 51.20$ ,  $SD = 17.5$ ). There was no significant difference in epidermal nuclei counts for KLF-MO  
840 mild ( $M = 54.60$ ,  $SD = 11.0$ ) or KLF-Cas9 mild ( $M = 53.25$ ,  $SD = 22.8$ ) relative to control embryos.  
841 Scale bars: 50  $\mu\text{m}$ .

Table1

**Table 1 | Primers and Oligonucleotides used in this study.** All sequences are oriented 5'-3'. Blue nucleotide sequences correspond to T7 promoter. Black bold italicized nucleotide sequences correspond to genomic *MleKlf* targets and include addition of two 5' *G* residues to aid T7 polymerase binding. Red nucleotide sequences denote region of complementarity between templated primers and Universal tracrRNA primer, which are annealed to form the sgRNA transcription template.

| Name                        | Use             | Forward                                                                                                   | Reverse               |
|-----------------------------|-----------------|-----------------------------------------------------------------------------------------------------------|-----------------------|
| <i>MleKlf5a</i>             | ISH probe       | ATGAGTGCTATGACATG                                                                                         | AAACGTGTTCAAATGCCTCTT |
| <i>MleKlf5b</i>             | ISH probe       | ATGGACGTTTCCACGC                                                                                          | AGACGAGCTAGGGGGAACG   |
| <i>MleKlfX</i>              | ISH probe       | GGCAGTTTAGTTTCGATCGG                                                                                      | TGCAGTGAGTGGTAGGTT    |
| <i>MleKlf5a sbMO#1</i>      | sbMO            | TCTCGTGTCTGAAACAATTTTA<br>AGT                                                                             | n/a                   |
| <i>MleKlf5a sbMO#2</i>      | sbMO            | GTCTACCACCTGCAAGATTTTA<br>AGT                                                                             | n/a                   |
| <i>MleKlf5b sbMO#1</i>      | sbMO            | CAGTTGATTCTCACCTGCCAA<br>GAA                                                                              | n/a                   |
| <i>MleKlf5b sbMO#2</i>      | sbMO            | CAAACAGACTTACCTTCAAATG<br>TGA                                                                             | n/a                   |
| <i>Standard Control</i>     | sbMO            | CCTCTTACCTCAGTTACAATTTA<br>TA                                                                             | n/a                   |
| <i>MleKlf5a sbMO RT-PCR</i> | sbMO validation | CCCTTGTAAACTTGAGCA                                                                                        | TCTTCGTGTAAACCTTCG    |
| <i>MleKlf5b sbMO RT-PCR</i> | sbMO validation | GACAAGTTCCAAAGACTAAC                                                                                      | TACAGTAGATGAGGAGGTTT  |
| Universal tracrRNA          | sgRNA synthesis | AAAAGCACCGACTCGGTGCCA<br>CTTTTCAAGTTGATAACGGAC<br>TAGCCTTATTTAACTT <b>GCTATT</b><br><b>TCTAGCTCTAAAAC</b> | n/a                   |
| sgRNA template              | sgRNA synthesis | <b>GAAATTAATACGACTCACTATA</b><br><b>GG[N<sub>xx</sub>]<b>GTTTTAGAGCTAGAAA</b></b><br><b>TAGC</b>          | n/a                   |
| <i>MleKlf5a-gRNA1</i>       | sgRNA synthesis | AGCAACGGGTCCGTCCGT                                                                                        | n/a                   |

Table1

|                                    |                                |                      |                      |
|------------------------------------|--------------------------------|----------------------|----------------------|
| <i>MleKlf5a</i> -gRNA2             | sgRNA synthesis                | TTGAGGGACGCGGGAGCAA  | n/a                  |
| <i>MleKlf5a</i> -gRNA3             | sgRNA synthesis                | ACGGAGGGAATCGGCGAT   | n/a                  |
| <i>MleKlf5a</i> -gRNA4             | sgRNA synthesis                | TTAGACTCTGTGCGGGG    | n/a                  |
| <i>MleKlf5b</i> -gRNA1             | sgRNA synthesis                | TGGTGATATAACCAGGCG   | n/a                  |
| <i>MleKlf5b</i> -gRNA2             | sgRNA synthesis                | ATCTTTCACGCTTAGGGGC  | n/a                  |
| <i>MleKlf5b</i> -gRNA3             | sgRNA synthesis                | CGCTTGGAGGGAACCTAA   | n/a                  |
| <i>MleKlf5b</i> -gRNA4             | sgRNA synthesis                | CTGAAACACCGGTCGCAG   | n/a                  |
| <i>MleKlf5a</i> -sgRNA4 sequencing | sgRNA/Cas9 cut site validation | AAGACGTCCGATATTCTCTC | GGTGATCACTCCTACTGAAA |
| <i>MleKlf5b</i> -sgRNA3 sequencing | sgRNA/Cas9 cut site validation | GGTGTCATACCTAGACGAT  | TGTGTCTGTGTATAGTCGAG |

Table2

**Table 2 | Off-target CRISPR/Cas9 loci with mismatches to either *MleKlf5a* or *MleKlf5b* target sequence and primers used for Sanger sequencing. All sequences are oriented 5'-3'.**

| Locus ID  | # Mismatches                 | Forward              | Reverse              |
|-----------|------------------------------|----------------------|----------------------|
| ML090223a | 4 ( <i>MleKlf5a</i> -sgRNA4) | AAATTGTTTGTGTTCACT   | AGTTTTCTTTGTTTCAGGG  |
| ML021138a | 5 ( <i>MleKlf5a</i> -sgRNA4) | CAGCTTCATTGTAAAGAGTC | TTAGTTCTTATGTTTTCGCG |
| ML200217a | 5 ( <i>MleKlf5b</i> -sgRNA3) | GGATACTAGTTCCATAGCAG | CTCCTTGTTGATATTCTGGA |
| ML00363a  | 6 ( <i>MleKlf5b</i> -sgRNA3) | TATGATTCTTGTTACCAGGG | ACATACGTCATCCTATTAGC |
| ML02979a  | 7 ( <i>MleKlf5b</i> -sgRNA3) | CTGCATGATTACAAAGGTTT | ATGCTAAGAAGGATGCAATA |

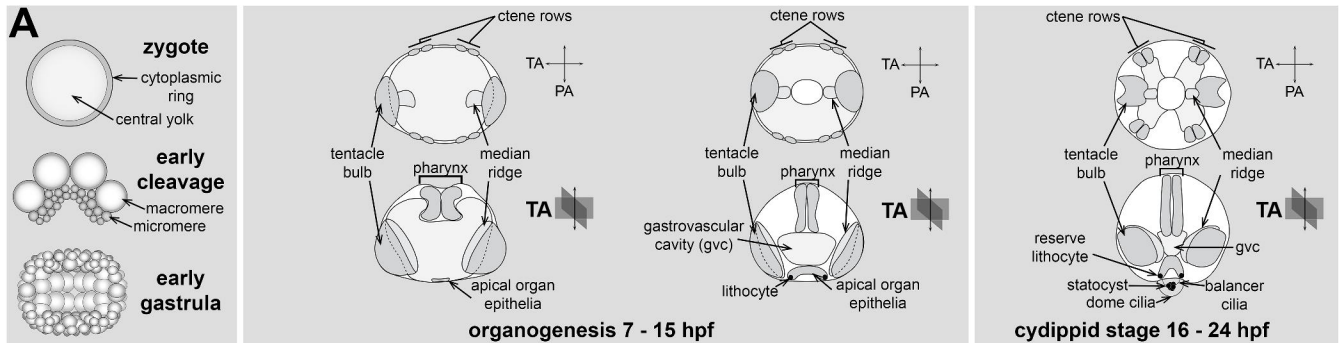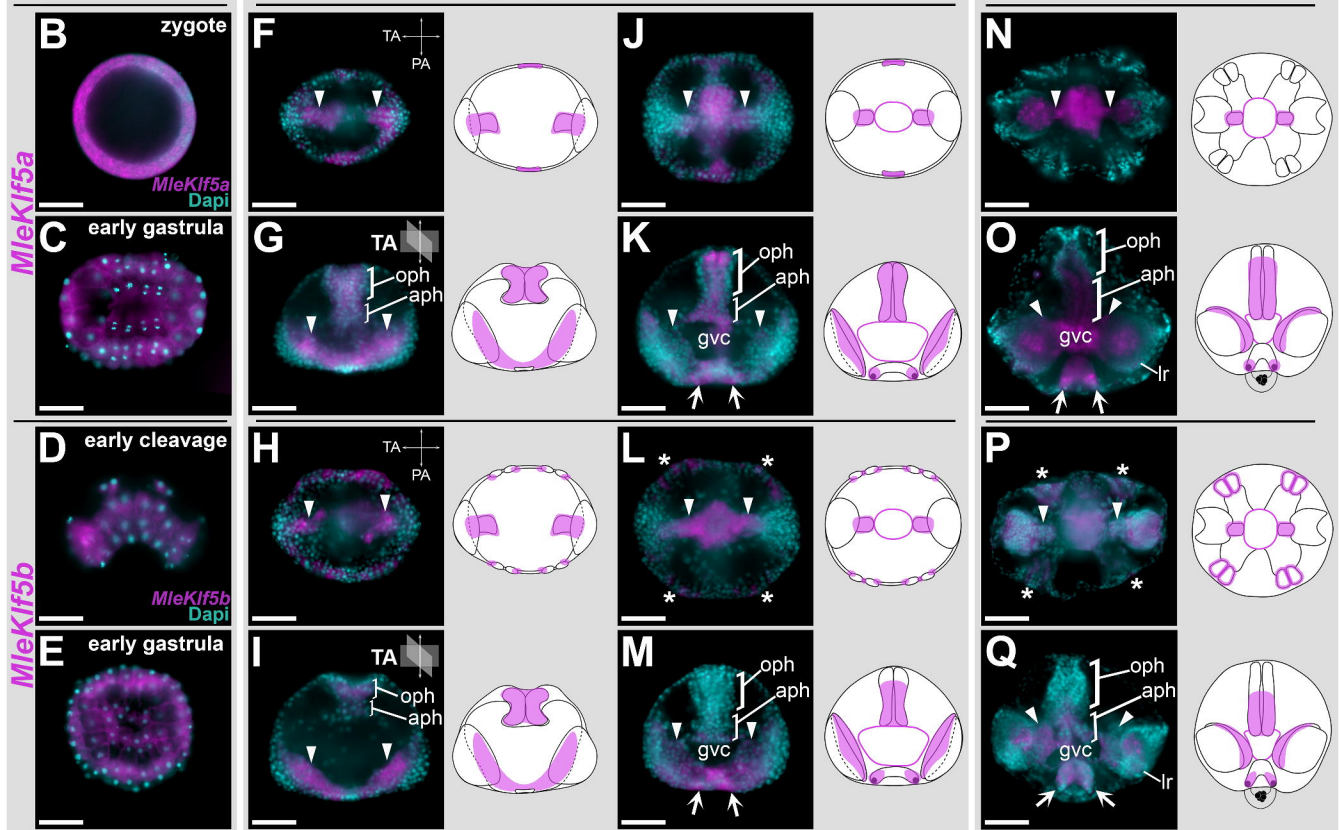



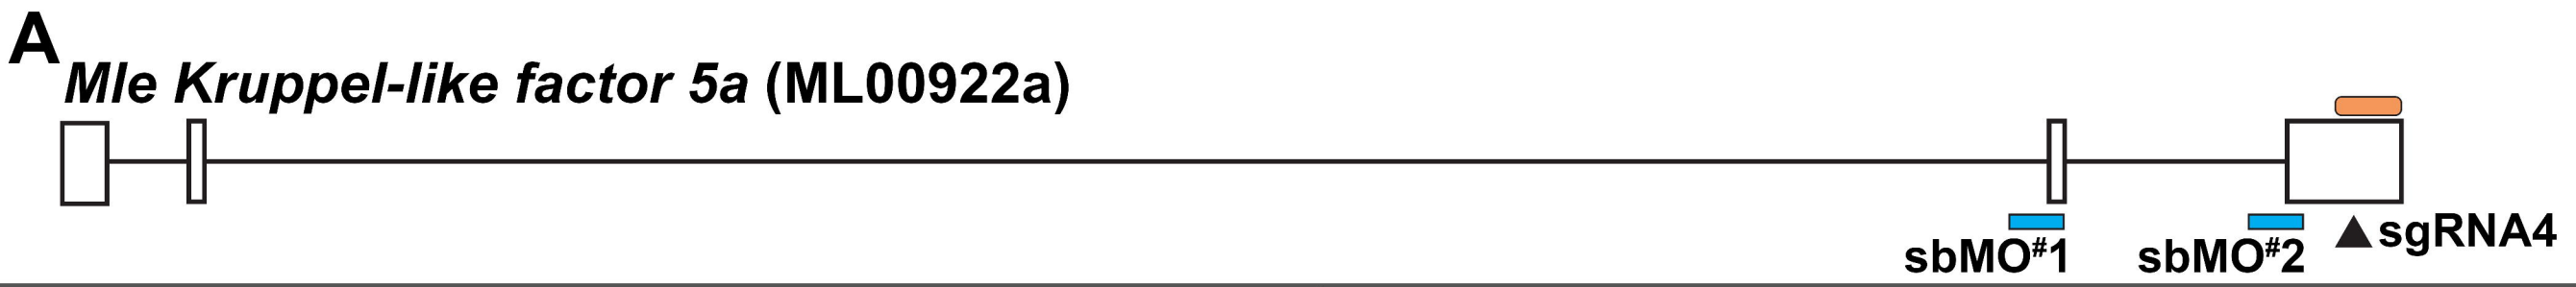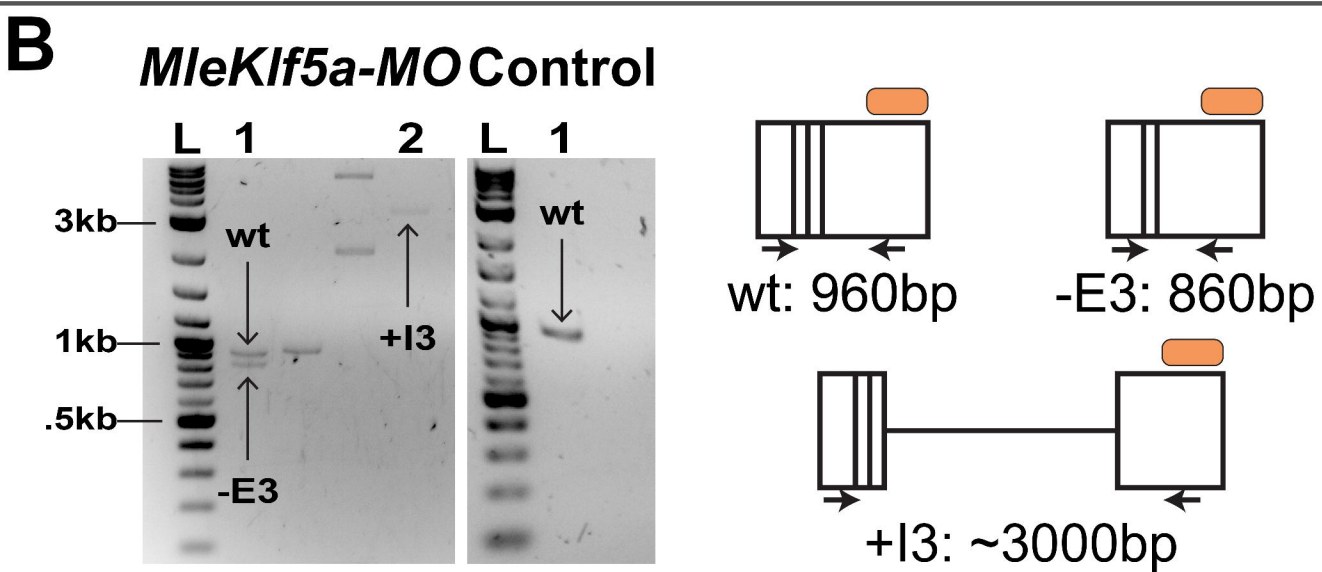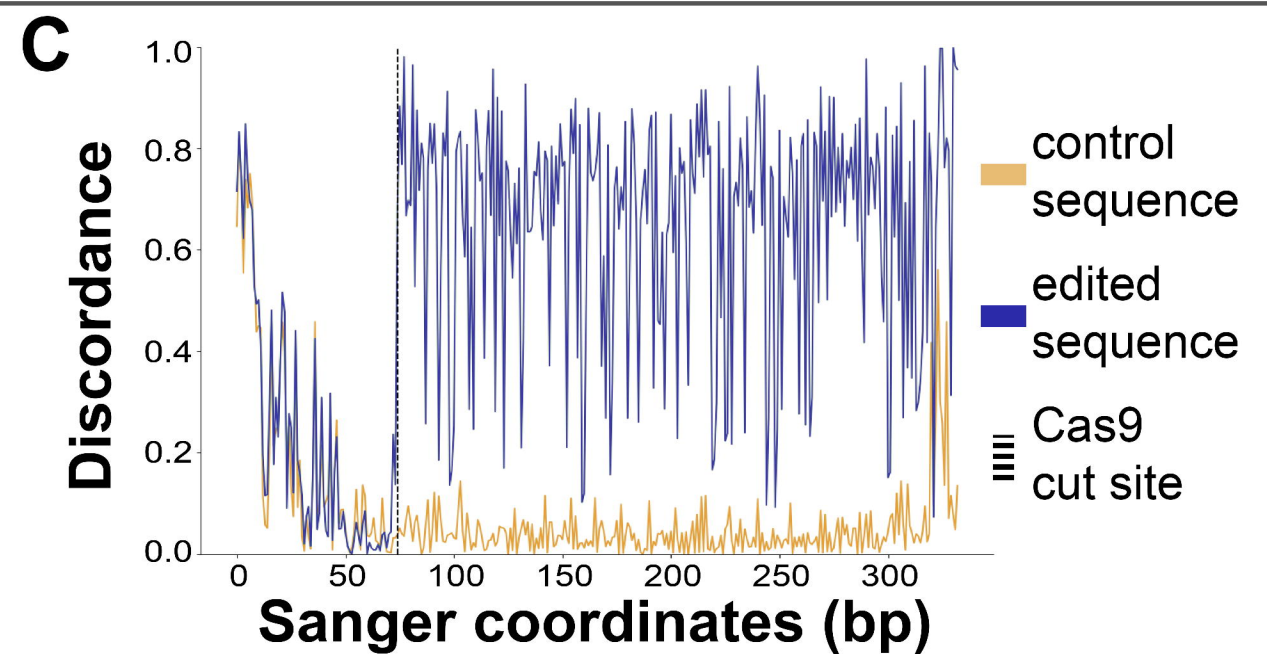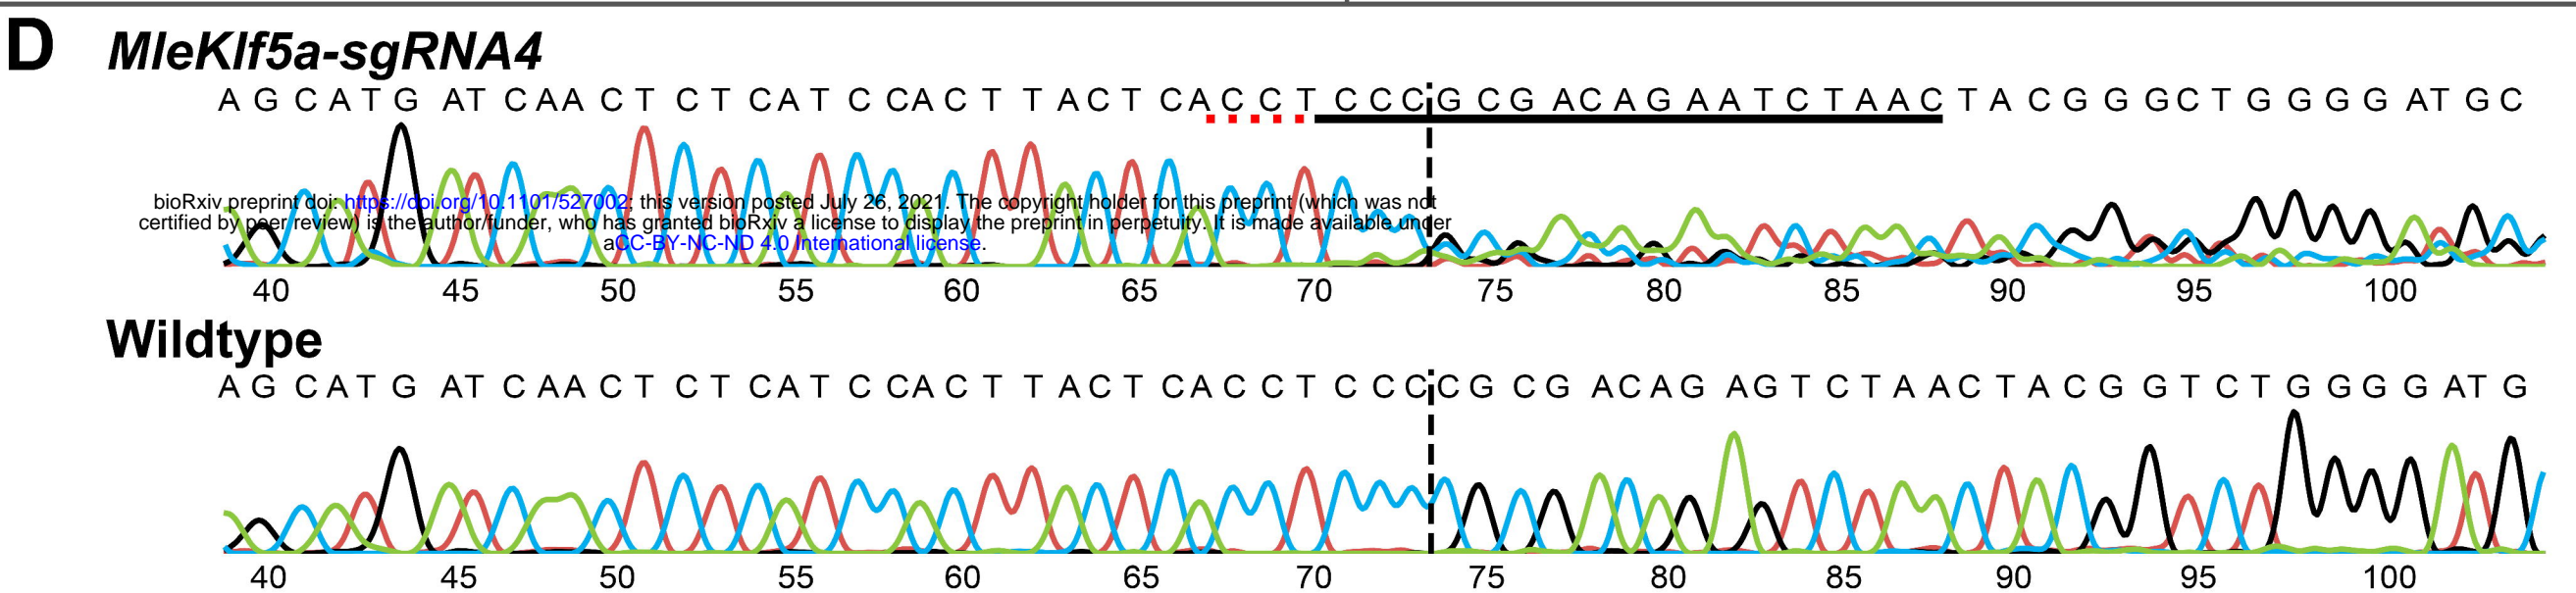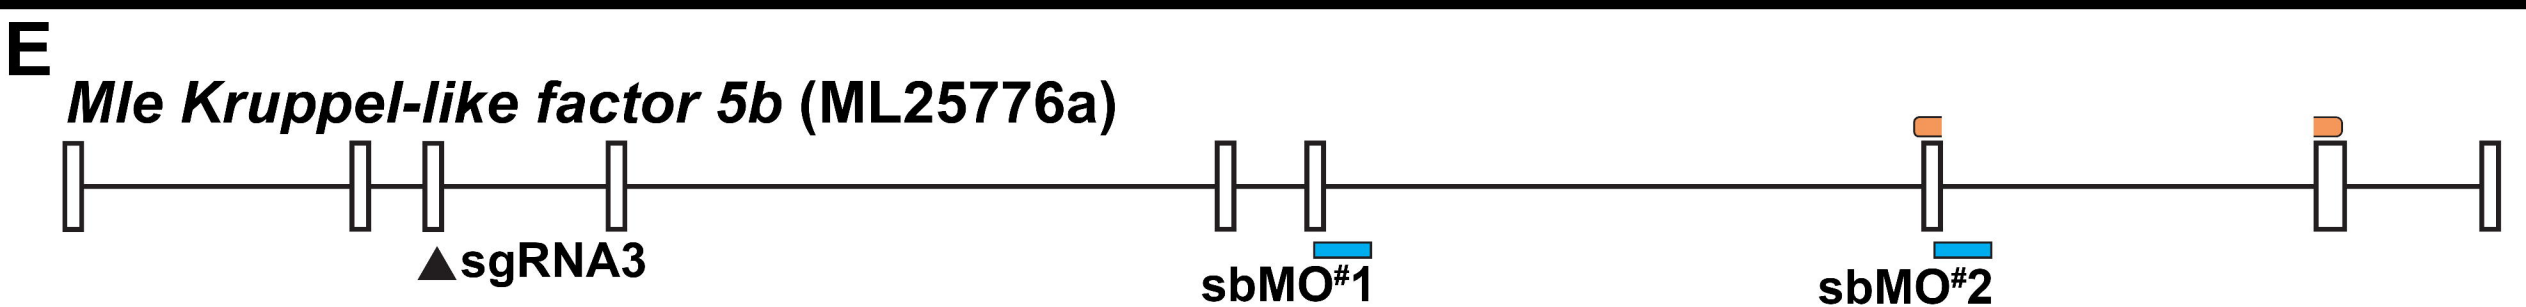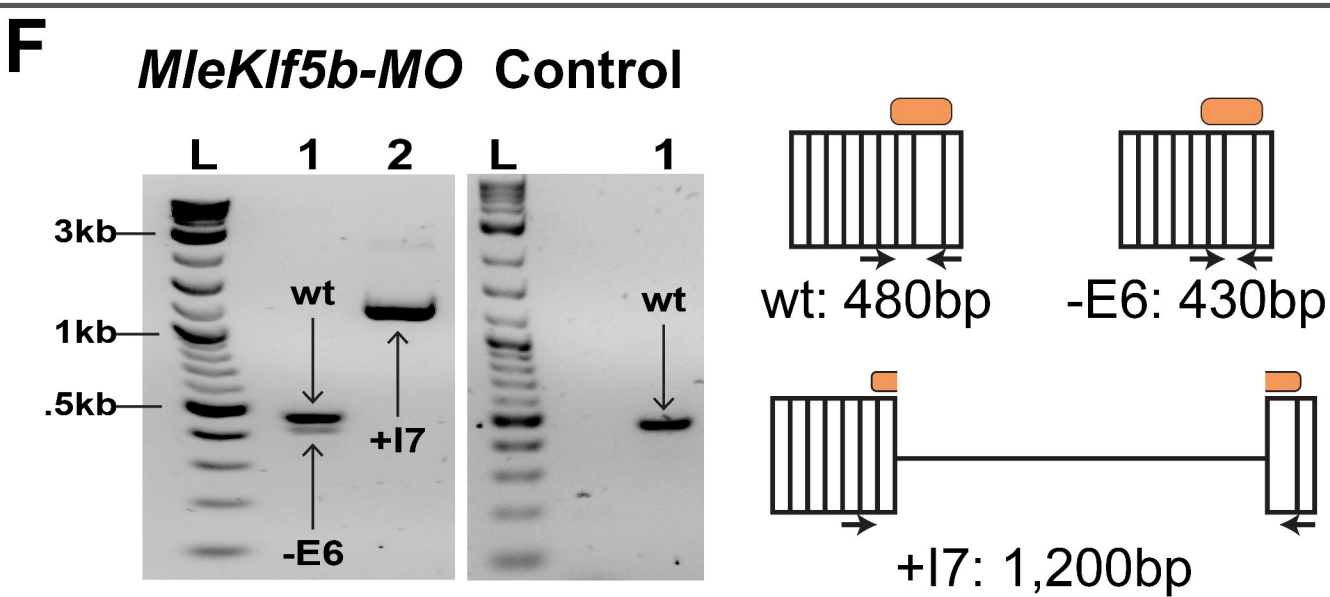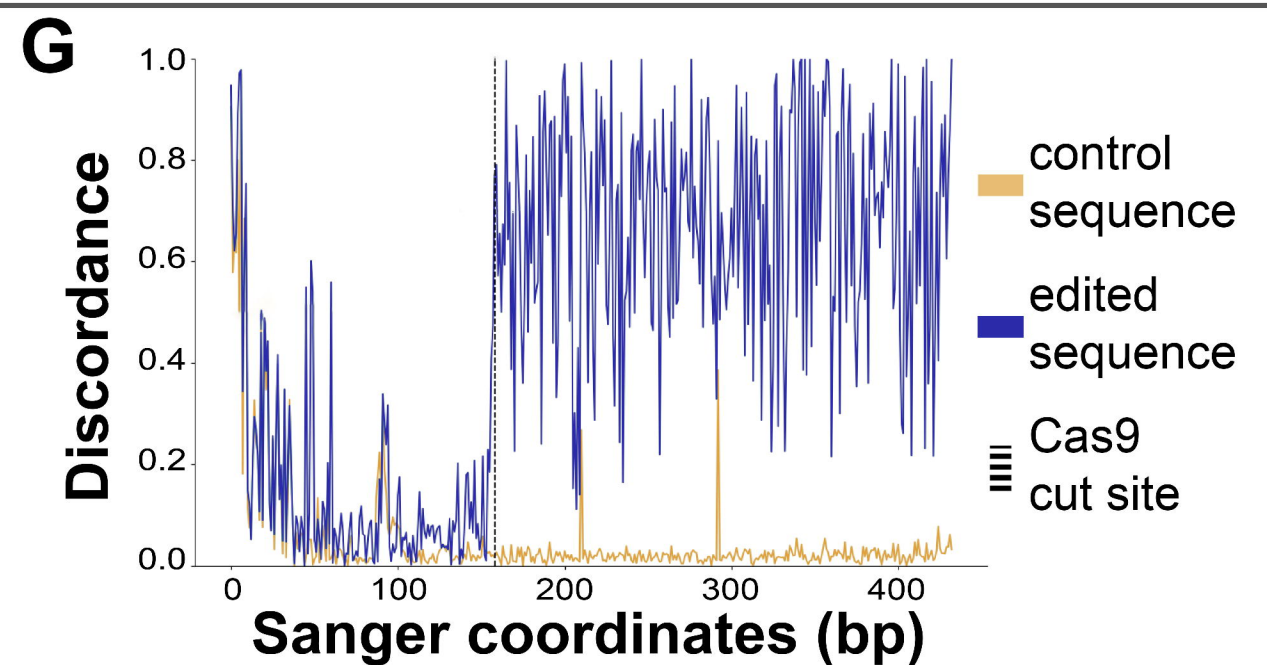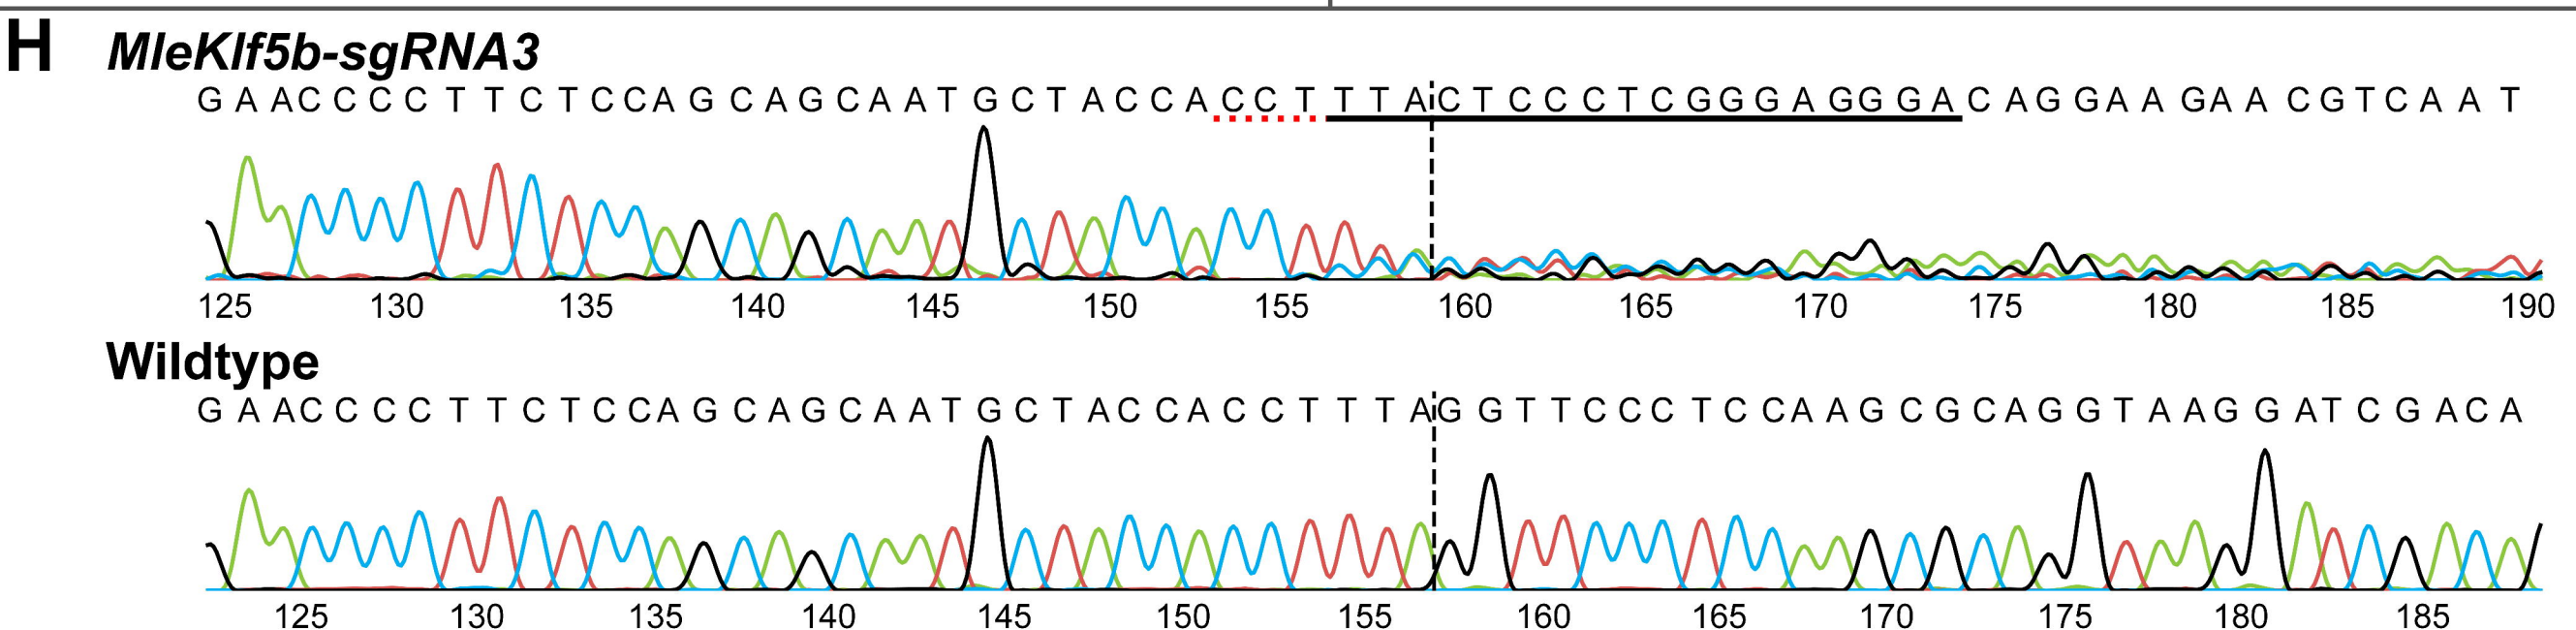



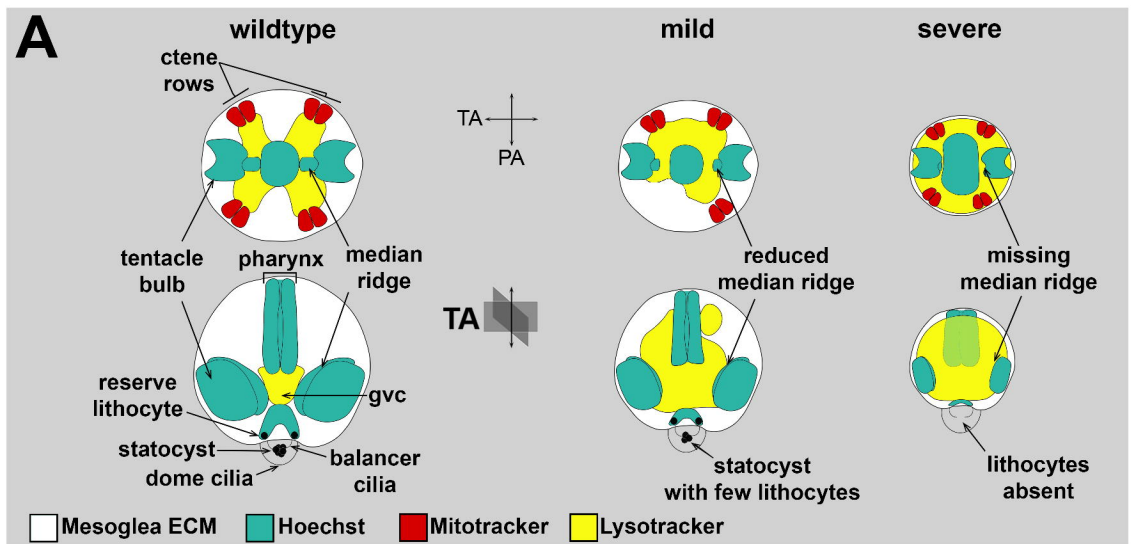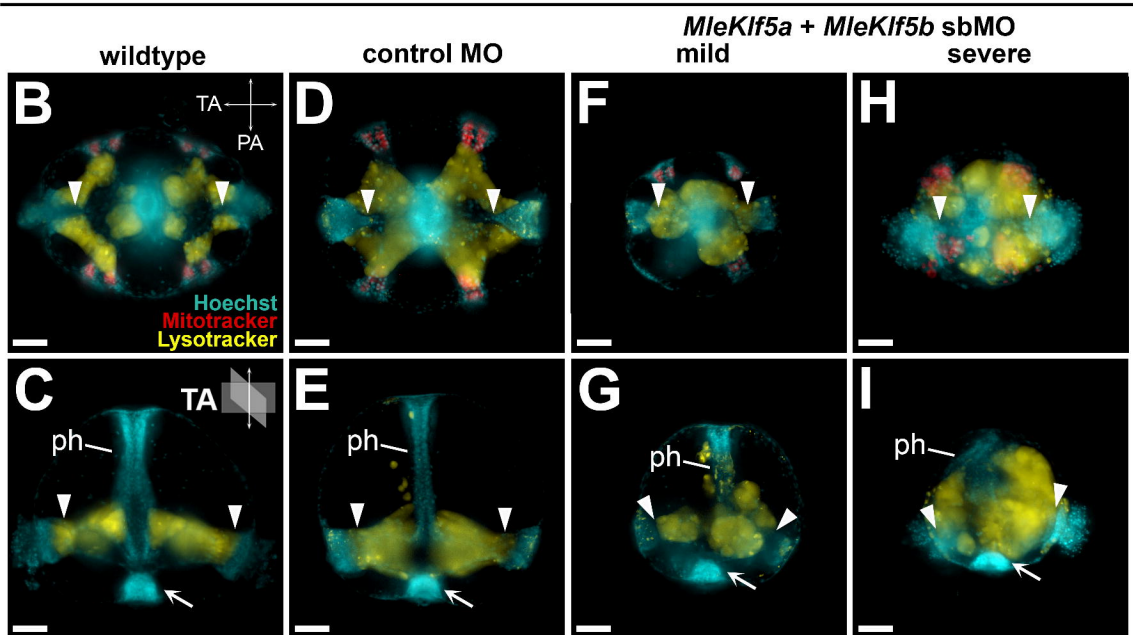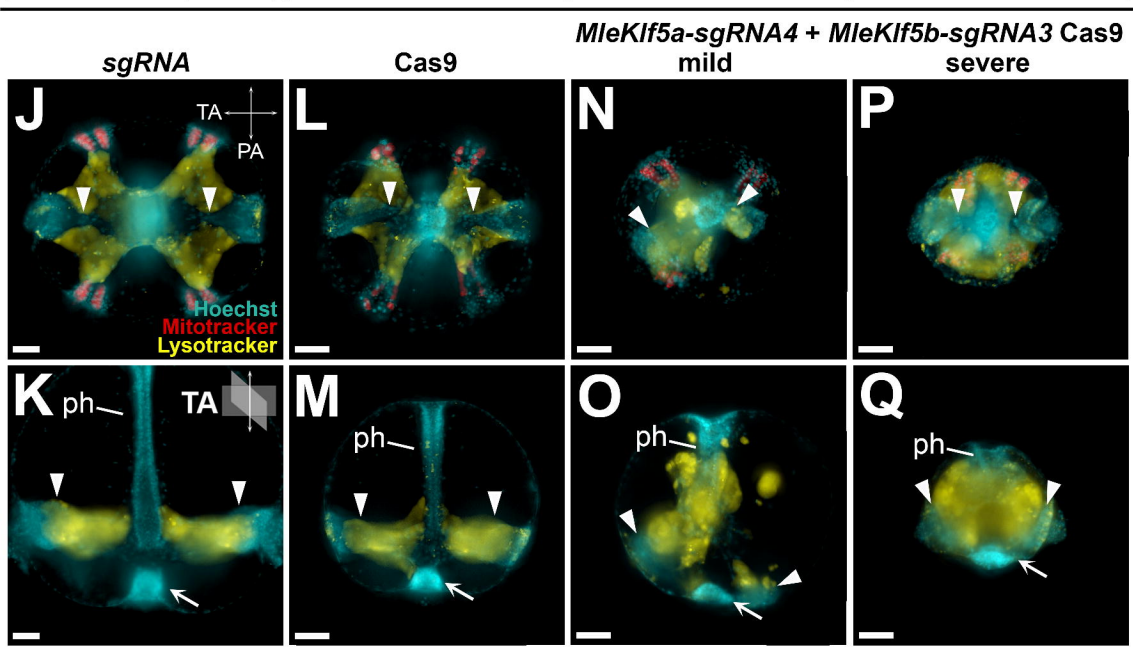

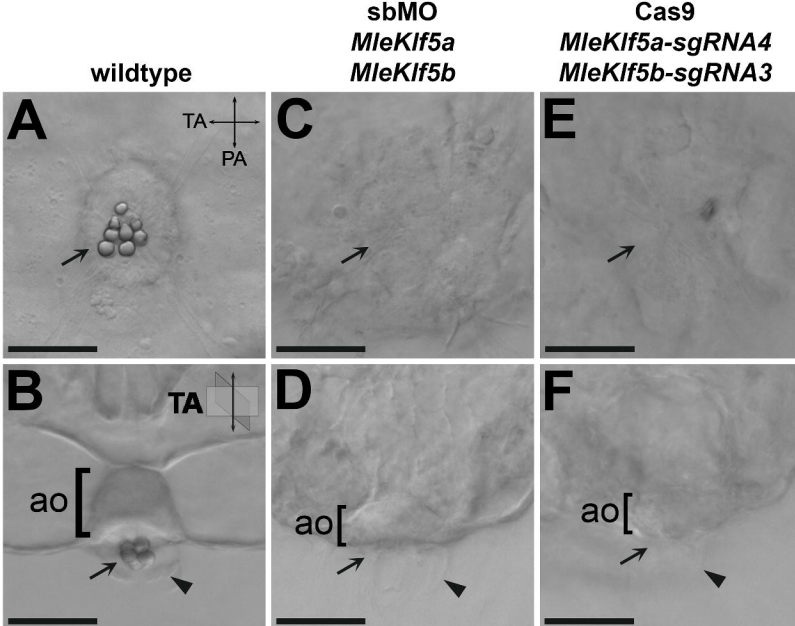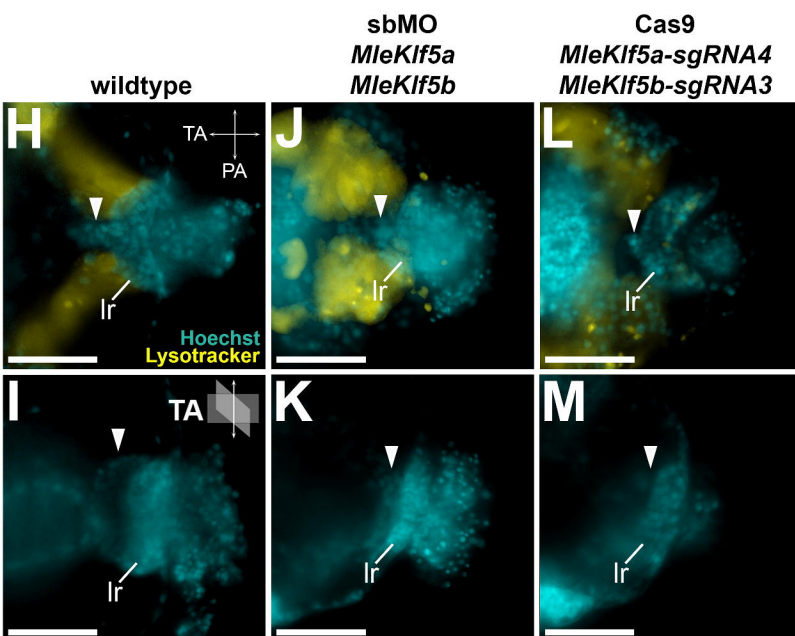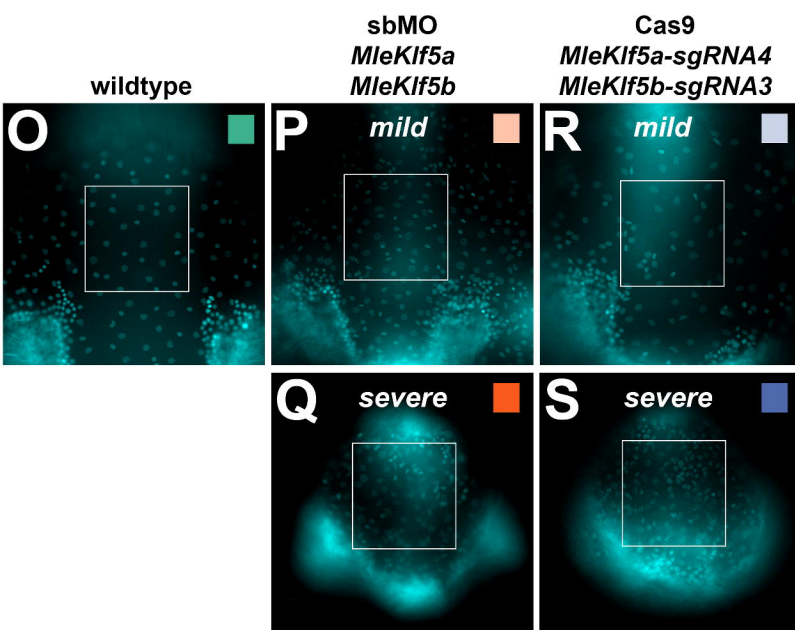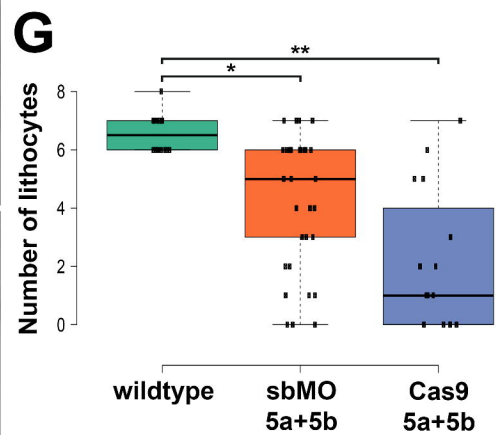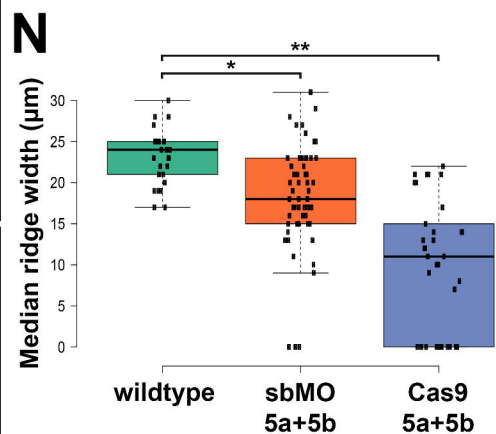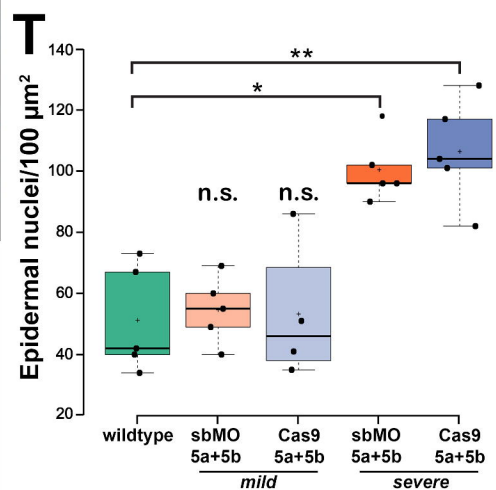

Source: https://www.biorxiv.org/content/10.1101/527002v4.full.pdf
